# Supplementary material for: Mapping the extent, range and nature of research activity on value-based healthcare in the 15 years following its introduction (2006–2021): a scoping review
Source: PubMed Central journal article supplement — BMJ Open. 2022 Aug 16;12(8):e064983. doi: 10.1136/bmjopen-2022-064983 (PMC9386216; doi:10.1136/bmjopen-2022-064983), 2022-08-16
Supplement: bmjopen-2022-064983.draft_revisions.pdf [file bmjopen-2022-064983.draft_revisions.pdf]

# BMJ Open

BMJ Open is committed to open peer review. As part of this commitment we make the peer review history of every article we publish publicly available.

When an article is published we post the peer reviewers' comments and the authors' responses online. We also post the versions of the paper that were used during peer review. These are the versions that the peer review comments apply to.

The versions of the paper that follow are the versions that were submitted during the peer review process. They are not the versions of record or the final published versions. They should not be cited or distributed as the published version of this manuscript.

BMJ Open is an open access journal and the full, final, typeset and author-corrected version of record of the manuscript is available on our site with no access controls, subscription charges or pay-per-view fees (<http://bmjopen.bmj.com>).

If you have any questions on BMJ Open's open peer review process please email [info.bmjopen@bmj.com](mailto:info.bmjopen@bmj.com)

# BMJ Open

## How value-based healthcare evolved: fifteen years of value-based healthcare research, a scoping review.

|                               |                                                                                                                                                                                                                                                                                                                                                                                                                                                                                                                                                                                                                                                                                                                                                                                                                                                                                                                                                                                                                                                                                                                                                                                                                                      |
|-------------------------------|--------------------------------------------------------------------------------------------------------------------------------------------------------------------------------------------------------------------------------------------------------------------------------------------------------------------------------------------------------------------------------------------------------------------------------------------------------------------------------------------------------------------------------------------------------------------------------------------------------------------------------------------------------------------------------------------------------------------------------------------------------------------------------------------------------------------------------------------------------------------------------------------------------------------------------------------------------------------------------------------------------------------------------------------------------------------------------------------------------------------------------------------------------------------------------------------------------------------------------------|
| Journal:                      | <i>BMJ Open</i>                                                                                                                                                                                                                                                                                                                                                                                                                                                                                                                                                                                                                                                                                                                                                                                                                                                                                                                                                                                                                                                                                                                                                                                                                      |
| Manuscript ID                 | bmjopen-2022-064983                                                                                                                                                                                                                                                                                                                                                                                                                                                                                                                                                                                                                                                                                                                                                                                                                                                                                                                                                                                                                                                                                                                                                                                                                  |
| Article Type:                 | Original research                                                                                                                                                                                                                                                                                                                                                                                                                                                                                                                                                                                                                                                                                                                                                                                                                                                                                                                                                                                                                                                                                                                                                                                                                    |
| Date Submitted by the Author: | 20-May-2022                                                                                                                                                                                                                                                                                                                                                                                                                                                                                                                                                                                                                                                                                                                                                                                                                                                                                                                                                                                                                                                                                                                                                                                                                          |
| Complete List of Authors:     | Vijverberg, Joanna; Maastricht University Medical Centre+, Department of Health Services Research; Sint Antonius Hospital, Department of Value-Based Healthcare<br>Daniels, Kirsten; Sint Antonius Hospital, Department of Value-Based Healthcare; Radboudumc Radboud Institute for Health Sciences, Scientific Center for Quality of Healthcare (IQ healthcare)<br>Steinmann, Gijs; Erasmus Universiteit Rotterdam Erasmus School of Health Policy and Management, Health Care Governance<br>Garvelink, Mirjam; Sint Antonius Hospital, Department of Value-Based Healthcare<br>Roupe van der Voort, Marc; Sint Antonius Hospital, Department of Juiste zorg, Juiste plaats, Juiste kosten<br>Biesma, Douwe; Leiden University Medical Center, Department of Internal Medicine<br>Bos, Willem Jan; Leiden University Medical Center, Department of Internal Medicine; Sint Antonius Hospital, Department of Internal Medicine<br>van Merode, Frits; Maastricht University Medical Centre+, Department of Health Services Research<br>van der Nat, Paul; Sint Antonius Hospital, Department of Value-Based Healthcare; Radboudumc Radboud Institute for Health Sciences, Scientific Center for Quality of Healthcare (IQ healthcare) |
| Keywords:                     | Health policy < HEALTH SERVICES ADMINISTRATION & MANAGEMENT, Quality in health care < HEALTH SERVICES ADMINISTRATION & MANAGEMENT, HEALTH SERVICES ADMINISTRATION & MANAGEMENT                                                                                                                                                                                                                                                                                                                                                                                                                                                                                                                                                                                                                                                                                                                                                                                                                                                                                                                                                                                                                                                       |
|                               |                                                                                                                                                                                                                                                                                                                                                                                                                                                                                                                                                                                                                                                                                                                                                                                                                                                                                                                                                                                                                                                                                                                                                                                                                                      |

SCHOLARONE™  
Manuscripts

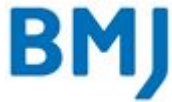

I, the Submitting Author has the right to grant and does grant on behalf of all authors of the Work (as defined in the below author licence), an exclusive licence and/or a non-exclusive licence for contributions from authors who are: i) UK Crown employees; ii) where BMJ has agreed a CC-BY licence shall apply, and/or iii) in accordance with the terms applicable for US Federal Government officers or employees acting as part of their official duties; on a worldwide, perpetual, irrevocable, royalty-free basis to BMJ Publishing Group Ltd ("BMJ") its licensees and where the relevant Journal is co-owned by BMJ to the co-owners of the Journal, to publish the Work in this journal and any other BMJ products and to exploit all rights, as set out in our [licence](#).

The Submitting Author accepts and understands that any supply made under these terms is made by BMJ to the Submitting Author unless you are acting as an employee on behalf of your employer or a postgraduate student of an affiliated institution which is paying any applicable article publishing charge ("APC") for Open Access articles. Where the Submitting Author wishes to make the Work available on an Open Access basis (and intends to pay the relevant APC), the terms of reuse of such Open Access shall be governed by a Creative Commons licence – details of these licences and which [Creative Commons](#) licence will apply to this Work are set out in our licence referred to above.

Other than as permitted in any relevant BMJ Author's Self Archiving Policies, I confirm this Work has not been accepted for publication elsewhere, is not being considered for publication elsewhere and does not duplicate material already published. I confirm all authors consent to publication of this Work and authorise the granting of this licence.

1  
2  
3 **How value-based healthcare evolved: fifteen years of value-based healthcare research, a**  
4 **scoping review.**  
5

6 Joanna R.G. Vijverberg<sup>1,2,\*</sup>, Kirsten Daniels<sup>2,3</sup>, Gijs Steinmann<sup>4</sup>, Mirjam M. Garvelink<sup>2</sup>, Marc B.V.  
7 Rouppe van der Voort<sup>5</sup>, Douwe H. Biesma<sup>6</sup>, Willem Jan W. Bos<sup>6, 7</sup>, Frits van Merode<sup>1</sup>, Paul B.  
8 van der Nat<sup>2,3</sup>  
9  
10  
11  
12  
13

14 <sup>1</sup> *Department of Health Services Research, Care and Public Health Research Institute (CAPHRI), Faculty of Health, Medicine*  
15 *and Life Sciences, Maastricht University Medical Centre+, Maastricht, The Netherlands*

16 <sup>2</sup> *Department of Value-Based Healthcare, St Antonius Hospital, Nieuwegein, the Netherlands*

17 <sup>3</sup> *Radboud Institute for Health Sciences, Scientific Center for Quality of Healthcare (IQ healthcare), Radboud University*  
18 *Medical Center, Nijmegen, the Netherlands*

19 <sup>4</sup> *Health Care Governance, Erasmus School of Health Policy & Management, Erasmus Universiteit, Rotterdam, Zuid-Holland,*  
20 *Netherlands*

21 <sup>5</sup> *Department of Juiste zorg, Juiste plaats, Juiste kosten, St Antonius Hospital, Nieuwegein, the Netherlands*

22 <sup>6</sup> *Department of Internal Medicine, Leiden University Medical Center, Leiden, the Netherlands*

23 <sup>7</sup> *Department of Internal Medicine, St Antonius Hospital, Nieuwegein, the Netherlands*

24 *\*Corresponding author: [a.vijverberg@antoniusziekenhuis.nl](mailto:a.vijverberg@antoniusziekenhuis.nl)*

25 *Department of Value-Based Healthcare, St Antonius Hospital, Postbus 2500, 3430 EM Nieuwegein, The Netherlands.*  
26  
27

## 28 **Keywords**

29 Value-based healthcare (VBHC); Integrated Practice Units; Outcome measurement; Bundled  
30 payments; Information Platforms; Implementation  
31  
32  
33

## 34 **Word count**

35 4142 words  
36  
37  
38  
39  
40  
41  
42  
43  
44  
45  
46  
47  
48  
49  
50  
51  
52  
53  
54  
55  
56  
57  
58  
59  
60

## Abstract

### *Objectives:*

We aimed to systematically map the extent, range and nature of research activity on value-based healthcare (VBHC), and to identify research gaps.

### *Methods:*

A scoping review with an additional cited reference search was conducted. Eligible articles mentioned VBHC or value with reference to the work of Porter or provided a definition of VBHC or value. The strategic agenda of Porter and Lee, consisting of six agenda items for implementing a high-value healthcare delivery system, was used to categorize the included articles.

### *Results:*

The searches yielded a total of 27.931 articles, of which 1.242 articles were analyzed. Most articles were published in North America. Most articles described an application of VBHC by measuring outcomes and costs (agenda item 2). The other agenda items were far less frequently described or implemented. Most of these articles were conceptual, meaning that nothing was actually changed or implemented.

### *Conclusion:*

The number of publications increased steadily after the introduction of VBHC in 2006. Almost one fifth of the articles could not be categorized in one of the items of the strategic agenda, which may lead to the conclusion that the current strategic agenda could be extended. In addition, a practical roadmap or guideline to implement VBHC is still lacking. Future research could fill this gap by specifically studying the effectiveness of VBHC in day-to-day clinical practice.

## Article Summary

### *Strengths and limitations of this study*

- This is the first scoping review that mapped the entire extent, range and nature of the research activity on value-based healthcare; its broad scope resulted in a comprehensive overview.
- With this scoping review, a database was created that can contribute to more in-depth systematic reviews to further explore what is known within each of the agenda items.

- 1  
2  
3 - This review exposed the gap in research regarding the effectiveness of value-based  
4 healthcare in daily practice.  
5  
6  
7  
8  
9  
10  
11  
12  
13  
14  
15  
16  
17  
18  
19  
20  
21  
22  
23  
24  
25  
26  
27  
28  
29  
30  
31  
32  
33  
34  
35  
36  
37  
38  
39  
40  
41  
42  
43  
44  
45  
46  
47  
48  
49  
50  
51  
52  
53  
54  
55  
56  
57  
58  
59  
60

For peer review only

## Introduction

In 2006, value-based healthcare (VBHC) was introduced as a way to reform healthcare.<sup>1</sup> Rising costs, mounting quality issues and an increasing healthcare demand prompted the development of the VBHC concept by Michael E. Porter and Elizabeth Olmsted Teisberg.<sup>1</sup> According to them, improving value for the patient should be the overarching goal in healthcare, with value defined as the health outcomes achieved per dollar spent.<sup>1</sup> To improve patient value, healthcare delivery should be organized around medical conditions over the full cycle of care. Universal measurement of value (outcomes and costs) is an important element in monitoring improvement.<sup>2</sup>

### *Strategic Agenda for value transformation*

In 2013, a strategic agenda was published, consisting of six agenda items for implementing a high-value healthcare delivery system (Box 1).<sup>3</sup> The agenda items were intended to support healthcare providers in the transition from a focus on volume, i.e. being organized around functionally organized departments and specialties, to a focus on value, i.e. being organized around what matters to patients with a specific medical condition.

**Box 1: the six agenda items of the strategic agenda.<sup>3</sup>**

|   |                                                                                        |
|---|----------------------------------------------------------------------------------------|
| 1 | Organize into integrated practice units (IPUs) around the patient's medical condition. |
| 2 | Measure outcomes and costs for every patient.                                          |
| 3 | Move to bundled payments for care cycles.                                              |
| 4 | Integrate care delivery across separate facilities.                                    |
| 5 | Expand excellent services across geography.                                            |
| 6 | Build an enabling information technology platform.                                     |

### *Implementation of VBHC*

The implementation of VBHC requires a major transition at both the level of healthcare providers, as well as at the level of (national) healthcare systems. Healthcare providers, such as hospitals, are typically (vertically) organized around functional departments and specialties. Transitioning towards an organization that is based on medical condition (horizontal) (agenda item 1) requires a fundamental reorganization of hospitals and their collaborating care-chain partners (agenda item 4). Measuring outcomes over the full cycle of care for a certain medical condition (agenda item 2) also requires further major change. When VBHC was introduced in

1  
2  
3 2006, healthcare quality systems were aimed at monitoring providers' compliance to  
4 (international) quality guidelines and norms. At the time, quality indicators were primarily  
5 focused on process optimization and safety. Health outcomes were hardly available and not  
6 measured at the level of medical conditions. Moreover, costs should be measured over the  
7 full cycle of care taking the true costs of care delivery into account. This requires a different  
8 approach for most healthcare providers (agenda item 2). The reimbursement of healthcare  
9 providers should move to payment for value, which not only requires major changes for  
10 healthcare providers, but also for health insurance companies and healthcare industry, such  
11 as pharmaceutical companies (agenda item 3). The expansion of excellent care across  
12 geography (agenda item 5) is challenging, because it arises from the progress on the other  
13 agenda items. Finally, building an enabling IT-platform (agenda item 6) is essential for the  
14 value transition. The availability of high-quality data and IT-infrastructure is named one of the  
15 main cornerstones to move forward with VBHC.<sup>4</sup>

### 26 27 28 29 *The maturity of VBHC*

30 Value-based healthcare has become a popular vision for healthcare organizations. Since the  
31 introduction of VBHC in the United States, the concept has spread around the world, and an  
32 increasing number of healthcare providers are adopting VBHC principles in order to  
33 continuously improve care. The article "What is value in health care?"<sup>5</sup> has since been cited  
34 over 4500 times.<sup>6</sup> However, few details have been published on how to practically implement  
35 VBHC. The strategic agenda proposed the major themes that need to be addressed in  
36 healthcare, but how to actually implement these items is hardly described. VBHC has been  
37 introduced as a strong vision for healthcare, but a practical guideline or scientific proof for the  
38 success of the proposed strategic agenda is lacking. As a result, various aspects of VBHC are  
39 only superficially understood and interpreted in different ways.<sup>7</sup> Scientific output on VBHC is  
40 important since the healthcare sector, perhaps more than in economics or management, uses  
41 an evidence-based paradigm. Healthcare professionals are used to consider the scientific  
42 evidence before implementing an organizational reform such as VBHC.

43  
44  
45  
46  
47  
48  
49  
50  
51  
52  
53  
54  
55  
56 In order to support organizations in the implementation of VBHC, it is important to understand  
57 how the VBHC concept and strategic agenda have been used in different contexts and have  
58 evolved over time. Therefore, the aim of this scoping review was to systematically map the  
59  
60



1  
2  
3 extent, range and nature of research activity on VBHC over the last fifteen years, and to  
4 identify potential research gaps.  
5  
6  
7

## 8 **Methods**

9  
10 This scoping review was guided by the Joanna Briggs Institute (JBI) methodology for  
11 conducting scoping reviews,<sup>8</sup> to answer the main research question: “What are the extent,  
12 range and nature of research activities on VBHC over the last fifteen years, and what are the  
13 research gaps?”  
14  
15  
16  
17

### 18 *Patient and Public Involvement*

19  
20 Patients and the public were not involved in this study’s design, conduct or dissemination  
21 plans.  
22  
23  
24  
25

### 26 *Eligibility criteria*

27  
28 The first eligibility criterium was that the article had to discuss or refer to VBHC. This criterium  
29 was met if the article 1) mentioned VBHC or value with reference to the work of Porter<sup>1 3 5 9-  
30 11</sup>, or 2) provided a definition of VBHC or value in line with Porter’s definition. If VBHC or value  
31 was only mentioned as a suggestion for further research, the article was not included.  
32  
33  
34  
35

36 The second criterium was that the context of the article had to be healthcare related. No  
37 restrictions were made with regard to the type of participants, type of study design or the  
38 outcomes measured. Only peer-reviewed articles were included.  
39  
40  
41  
42

### 43 *Information sources and search strategy*

44  
45 The three-step search strategy from the Joanna Briggs Institute was used.<sup>8</sup> First, an initial  
46 limited search was performed in PubMed. The title, abstract and index terms of the retrieved  
47 articles were analyzed to provide keywords for the final search. Second, the final search was  
48 carried out using the identified keywords from step 1. This search was undertaken in PubMed,  
49 Embase and Web of Science (Supplementary File I). Third, the reference lists of all the  
50 retrieved articles were examined for additional articles. Additionally, a cited reference search  
51 for the article “What is value in health care?” was conducted.<sup>5</sup> In perspective with Porter's  
52 other references on VBHC, this is his most cited article.  
53  
54  
55  
56  
57  
58  
59  
60

1  
2  
3 Only articles published in English were included. The search was limited to publications  
4 between 1 January 2006 and 7 June 2021 (the day of the search), because of the introduction  
5 of VBHC in 2006.<sup>1</sup>  
6  
7  
8  
9

### 10 *Selection process*

11 All search results were uploaded to EndNote. Duplicates were removed before screening.  
12 Titles, abstracts and full texts were independently assessed for eligibility by pairs of reviewers  
13 (JV, KD, GS, PN, MG). Reviewers did not screen articles they had written themselves.  
14 Discrepancies between reviewers were resolved in consensus meetings. If necessary, a third  
15 reviewer made the final decision. For the selection process, the application Rayyan was used.<sup>12</sup>  
16  
17  
18  
19  
20  
21  
22

### 23 *Data extraction*

24 Data were independently extracted using a data-extraction form in REDCap (Research  
25 Electronic Data Capture) which was specifically developed and pilot tested for this review.<sup>13 14</sup>  
26 Extraction questions were aimed at the article's main characteristics, references to VBHC,  
27 design, measured outcomes and the implemented elements of the strategic agenda. For each  
28 article, the reviewers (JV, KD, GS, PN, MG) indicated which items of the strategic agenda were  
29 reported, and had the possibility to write down potential new agenda items.  
30  
31  
32  
33  
34  
35

36 Data from 10% of the articles (at random) was double extracted by two independent  
37 reviewers. Discrepancies in the extracted data were discussed and resolved by a set of  
38 reviewers. Thereafter, data extraction of the remaining 90% was performed by one reviewer  
39 (JV, KD, GS, MG) and checked by a second.  
40  
41  
42  
43  
44

### 45 *Analysis and presentation of results*

46 The PRISMA flowchart was used to summarize the review decision process.<sup>15</sup> The extracted  
47 data were summarized quantitatively. The categorical data were expressed as frequencies.  
48 The statistical analysis was performed with use of Mathematica software (Wolfram Research,  
49 Inc., Mathematica, Version 12.1.1, Champaign, IL (2021)).  
50  
51  
52  
53  
54  
55  
56  
57  
58  
59  
60

## Results

### *Selection*

The search yielded a total of 27.931 articles, of which 2.218 articles were found by the cited reference search (**Error! Reference source not found.**). After duplicate removal, 12.909 potentially relevant articles remained. Title and abstract screening resulted in 8.078 articles to be excluded. Ten articles were excluded because no full text was available. The remaining 4.821 articles were assessed for eligibility in a full text screening, of which 74 articles were excluded because they were not peer-reviewed and 3.501 articles were excluded because they did not discuss or refer to VBHC. In total, 1.246 articles were included in this review. Four of these articles were not included in the analysis because they were written by Porter and described elements of the VBHC theory (source reports). Finally, 1.242 articles were analysed.<sup>2</sup>  
<sup>10 11 16</sup> The full dataset with included articles and collected outcomes can be found in Supplemental File II.

### *Review findings*

#### General

From 2006 to 2011 less than 10 articles were published per year (**Error! Reference source not found.**). The number of articles increased yearly, with the exception of 2018. North American centers published 72% (n=894) of the articles and published all the included articles up to the year 2009. In Europe, the first articles on VBHC were published in 2009. South America, Oceania, Asia and Africa together published 5% of the included articles (n=70).

Most articles were original articles (n=627, 50%), followed by narrative reviews, perspectives, opinion papers, and short report (n=506, 41%). Six percent of the articles were systematic or scoping literature reviews (n=69). Case studies accounted for 3% of the included articles (n=36) and methodologies for less than 1% (n=4) (Table 1).

Most of the original articles had an observational study design (n=561, 89%); 7% of the articles had an experimental design (n=42). In 76% of the original articles quantitative research methods were used (n=474). A small part of the articles used a qualitative method (n=72, 11%). Of the 561 observational articles, the majority collected the data retrospectively (n=337, 60%).

The effect measures or endpoints in the original articles were clinical outcomes (n=359, 57%), costs (n=291, 46%), patient reported outcome measures (PROMs) (n=125, 20%), patient reported experience measures (PREMs) (n=31, 5%), no outcomes (n=73, 12%), or were indicated not applicable (NA) (n=47, 8%). Four articles measured all the above effect measures (clinical outcomes, costs, PROMs and PREMs). Twenty-four percent of the articles that measured PROMs measured generic PROMs (n=30), 33% measured condition-specific PROMs (n=41) and 31% measured both (n=39). In 12% of the articles that measured PROMs (n=15), it was unknown which PROMs were used.

When comparing the two continents that published the most articles (North America and Europe), a difference in measured endpoints was noted. In North America, the emphasis was on measuring clinical outcomes and costs (resp. n=274, 62% and n=243, 55%). While in Europe, the emphasis was on measuring clinical outcomes and PROMs (resp. n=67, 47% and n=46, 32%). Costs were measured less frequently as endpoint in Europe (n=35, 24%).

Most original articles reported on patients (n=463, 74%), some on healthcare professionals (n=116, 19%) (Table 3).

### Medical context

More than 50% of the articles reported on hospital care (Table 1). The most often studied medical specialty was orthopedic surgery (n=182, 15%) (Table 2).

**Table 1: Characteristics of included articles.**

| Characteristics                                                                                   | N (%)    |
|---------------------------------------------------------------------------------------------------|----------|
| <b>Type of article</b>                                                                            |          |
| Original article                                                                                  | 627 (50) |
| Short report / Brief communications / Perspective / Commentary / Opinion paper / Narrative review | 506 (41) |
| Literature review (scoping or systematic)                                                         | 69 (6)   |
| Case study                                                                                        | 36 (3)   |
| Methodology                                                                                       | 4 (<1)   |
| <b>Study design</b>                                                                               |          |
| Observational design                                                                              | 561 (89) |
| Experimental design                                                                               | 42 (7)   |
| Both designs                                                                                      | 4 (1)    |
| Unknown                                                                                           | 5 (1)    |
| Not applicable                                                                                    | 15 (2)   |

|                                         |          |
|-----------------------------------------|----------|
| <b>Research method</b>                  |          |
| Quantitative method                     | 474 (76) |
| Qualitative method                      | 72 (11)  |
| Both methods                            | 67 (11)  |
| Unknown                                 | 8 (1)    |
| Not applicable                          | 6 (1)    |
| <b>Data collection</b>                  |          |
| Retrospective                           | 337 (60) |
| Cross-sectional                         | 113 (20) |
| Prospective                             | 86 (15)  |
| Mix of retrospective and prospective    | 14 (3)   |
| Unknown                                 | 5(1)     |
| Not applicable                          | 6 (1)    |
| <b>Type of organization<sup>#</sup></b> |          |
| Hospital                                | 687 (55) |
| Public / Preventive care organization   | 27 (2)   |
| University                              | 12 (1)   |
| General practitioner                    | 11 (1)   |
| Pharmaceutical organization             | 8 (1)    |
| Health insurer                          | 3 (<1)   |
| Other*                                  | 56 (5)   |
| Unknown                                 | 77 (6)   |
| Not applicable                          | 378 (30) |

<sup>#</sup>Total is more than 100% because multiple answers could be selected. <sup>\*</sup>For example: ambulatory care organizations, databases, dental care organizations, companies, focus clinics, government, home care facilities, NGOs, primary healthcare, rehabilitation facilities.

**Table 2: Medical specialties studied in the included articles.**

| <b>Medical specialty<sup>§</sup></b> | <b>N (%)</b> |
|--------------------------------------|--------------|
| Orthopedic surgery                   | 182 (15)     |
| Internal medicine <sup>^</sup>       | 178 (14)     |
| Surgery <sup>^</sup>                 | 111 (9)      |
| Radiology <sup>^</sup>               | 61 (5)       |
| Pediatrics <sup>^</sup>              | 50 (4)       |
| Anesthesiology                       | 38 (3)       |
| Urology                              | 32 (3)       |
| Plastic surgery                      | 31 (2)       |
| Thoracic surgery                     | 31 (2)       |
| Otolaryngology                       | 29 (2)       |
| Obstetrics and gynecology            | 26 (2)       |
| Neurological surgery                 | 22 (2)       |
| Colon and rectal surgery             | 20 (2)       |
| Neurology                            | 20 (2)       |
| Physical medicine and rehabilitation | 20 (2)       |

|                                             |          |
|---------------------------------------------|----------|
| Neurological surgery and orthopedic surgery | 18 (1)   |
| Psychiatry                                  | 16 (1)   |
| Ophthalmology                               | 12 (1)   |
| Emergency medicine                          | 10 (1)   |
| Dermatology                                 | 9 (1)    |
| Family medicine                             | 4 (<1)   |
| Allergy and immunology                      | 2 (<1)   |
| Pathology                                   | 2 (<1)   |
| NA                                          | 248 (20) |
| Multiple                                    | 18 (1)   |
| Other^                                      | 52 (4)   |

*§List of specialties according to the American Board of Medical Specialties.<sup>17</sup> ^Subspecialties are displayed in Supplementary File III.*

**Table 3: Population of original articles.**

| <b>Study population (n=627)</b>                          |                          | <b>N (%)</b>                  |
|----------------------------------------------------------|--------------------------|-------------------------------|
| <b>Type of population<sup>#</sup></b>                    | Patients                 | 463 (74)                      |
|                                                          | Healthcare professionals | 116 (19)                      |
|                                                          | Other                    | 52 (8)                        |
|                                                          | Not applicable           | 52 (8)                        |
| <b>Median size of patient population</b>                 |                          | 565 (min: 3, max: 18.474.860) |
| <b>Median size of healthcare professional population</b> |                          | 40 (min: 3, max: 185.075)     |

*<sup>#</sup>Total is more than 100% because multiple answers could be selected.*

### Value-based healthcare

All included articles were rated for their extent to which VBHC played a role in the article. From highest to lowest VBHC rating, the categories were: 1. describing or implementing multiple agenda items and/or using the whole VBHC theory (n=171, 14%); 2. describing or implementing one of the agenda items (n=395, 32%); 3. discussing or using value in the article with Porter's definition, but not discussing or implementing any agenda items (n=373, 30%); 4. mentioning VBHC only as a motivation or context in the article (n=290, 23%) (Table 4). Furthermore, the type of article was registered. Most articles were either conceptual or with an application. Conceptual articles are solely descriptive, whereas articles with an application researched a topic in daily practice. Only 11% of the included articles were development studies, meaning that an innovation or initiative was developed but not implemented.

Most of the articles (n=953, 77%) referred to Porter's article "What is value in health care"<sup>5</sup> (Supplementary File IV). Articles that contained multiple sections (n=735) mostly

referred to a paper of Porter in the introduction section (n=564, 77%), or the discussion section (n=233, 32%) (Supplementary File IV).

**Table 4: Overview of each article's relation to VBHC.**

| <b>Extent to which VBHC played a role in the article (as rated by extractors)</b> | <b>N (%)</b> |
|-----------------------------------------------------------------------------------|--------------|
| 1. Describe or implement multiple agenda items (highest rating)                   | 171 (14)     |
| 2. Describe or implement a specific part of VBHC or the strategic agenda          | 395 (32)     |
| 3. Discuss how to improve value or measure value, with value defined              | 373 (30)     |
| 4. VBHC is context or motivation for the study (lowest rating)                    | 290 (23)     |
| Other <sup>^</sup>                                                                | 13 (1)       |
| <b>Type of article <sup>#</sup></b>                                               | <b>N (%)</b> |
| Conceptual article                                                                | 528 (43)     |
| Article with a development                                                        | 138 (11)     |
| Article with an application <sup>&amp;</sup>                                      | 579 (47)     |

<sup>^</sup>For example: discussed VBHC as one of the possible approaches or description of a new interpretation of VBHC.

<sup>#</sup>Total was more than 100% because multiple answers could be selected. <sup>\$</sup> 58% (n=721) of the articles had one Porter reference, 36% of the articles had two or more references (mean: 2.6, range: 2-6). <sup>&</sup>For example: research into an implementation or retrospective research into two different patient groups.

### Implementation in general

In 288 articles (23%), the effect of an implementation was measured. The definition of an implementation article was that the article described a new process or technique implemented in daily work and presented the results. Two hundred seven of these articles (79%) reported that the implementation was a success. Forty-five articles (16%) had no statements regarding the effectiveness of implementation and 16 articles (5%) reported that the implementation was not a success.

### Items of the strategic agenda

The most frequently found agenda item was measuring outcomes and/or costs (n=941, 76%). All other agenda items were found in less than 10% of the articles (Table 5). Five articles discussed or implemented all the agenda items.

For 228 articles, no agenda item could be selected. The six most mentioned 'new' agenda items were 'other type of contracting' (n=29), 'quality improvement' (n=23), 'VBHC culture' (n=11), 'education' (n=10), 'shared decision making' (n=8) and 'care delivery value chain' (n=5). Table 6 shows the number of agenda items selected per article. For most articles only one agenda item was selected (n=868, 70%). All the agenda items are discussed separately in the next sections.

**Table 5: Reported agenda items.**

| Agenda item #                                                                             | N (%)    |
|-------------------------------------------------------------------------------------------|----------|
| 1. Organize into integrated practice units (IPUs) around the patient's medical condition. | 71 (6)   |
| 2. Measure outcomes and costs for every patient.                                          | 941 (76) |
| 3. Move to bundled payments for care cycles.                                              | 84 (7)   |
| 4. Integrate care delivery across separate facilities.                                    | 22 (2)   |
| 5. Expand excellent services across geography.                                            | 13 (1)   |
| 6. Build an enabling information technology platform.                                     | 83 (7)   |
| No item selected                                                                          | 228 (18) |

#Total is more than 100% because multiple answers could be selected.

**Table 6: Number of agenda items selected per article.**

| Number of selected agenda items | N (%)    |
|---------------------------------|----------|
| 0                               | 228 (18) |
| 1                               | 868 (70) |
| 2                               | 115 (9)  |
| 3                               | 19 (2)   |
| 4                               | 6 (<1)   |
| 5                               | 1 (<1)   |
| 6                               | 5 (<1)   |

### Agenda item 1: Organizing into IPU

Although 71 articles discussed an IPU, only three of them reported on the actual implementation of an IPU (4%). In most articles, the IPU was focused on one medical condition (n=32, 45%) and involved a multidisciplinary team (n=43, 61%) (Table 7).

Most of the articles that discussed an IPU were conceptual (n=41, 58%). Thirty-four percent (n=24) of the articles that discussed an IPU implemented some sort of a (medical) intervention or did a comparative study. Two articles (n=2, 3%) described the development of an IPU. Four articles combined these three phases.

### Agenda item 2: Measuring outcomes and costs

Of 941 articles reporting on outcomes and costs, most articles compared outcomes between treatments or interventions (n=155, 16%). A quarter of the articles did not compare outcomes (n=238, 25%). Of the 554 original articles in this category, 30% (n=168) reported solely on outcomes (clinical, PROMs or PREMs), 16% (n=87) reported solely on costs and 36% (n=201)



1  
2  
3 reported on both outcomes and costs. Eighteen percent (n=98) reported on other type of end  
4 points.  
5

6  
7 Different types of costs were measured. Direct costs were reported in 274 articles  
8 (29%); 40 articles reported direct and indirect costs (4%). Sixty-six articles measured the costs  
9 along the entire chain (20%). No distinction was made between whether the entire care chain  
10 was located inside or outside the hospital. Sixty-three articles (7%) developed a standard  
11 outcome set and thirteen articles (1%) a PROM (Table 7).  
12  
13  
14

15  
16 Half of the articles that discussed outcomes and costs reported an application (n=486,  
17 52%), a third of the articles were conceptual (n=308, 33%) and 10% reported on a  
18 development (n=95, 10%). Fifty-two articles reported on a combination of the three categories  
19 (n=52, 5%).  
20  
21  
22

### 23 24 25 Agenda item 3: Moving to bundled payments

26  
27 There were 84 articles that discussed a form of bundled payments (Table 7). Most of the  
28 articles were conceptual (n=55, 65%), followed by articles with an application (n=26, 31%) and  
29 articles with a development (n=2, 2%). One article described a combination of the three  
30 categories.  
31  
32  
33

34 Besides bundled payments, 'other forms of contracting' were frequently discussed. For  
35 example, pay for performance bonuses was discussed in 48 of all included articles (4%) and  
36 population-based payments in 8 articles (1%).  
37  
38  
39

### 40 41 42 Agenda item 4: Integrating across separate facilities

43  
44 Of the 22 articles in this category, eleven articles reported on a collaboration between  
45 healthcare providers or hospitals (50%). One article described the collaboration between a  
46 healthcare provider and an insurance company (5%). Another article discussed the  
47 collaboration between a healthcare provider and a university (5%). For the other nine articles,  
48 the question was not applicable (41%).  
49  
50  
51

52  
53 Fifty percent of the articles were conceptual (n=11, 50%), followed by articles with an  
54 application (n=8, 36%) and articles with a development (n=2, 9%). One article was a  
55 combination of the three categories (n=1, 5%).  
56  
57  
58

### 59 60 Agenda item 5: Expanding across geography

Thirteen articles reported on a spread of best practices across geography. Six of these articles reported on a spread within the country (national) (n=6, 46%). Seven articles reported on a spread across geography (n=7, 54%), but it remained unknown in which way. There were no articles that reported on a spread of best practices between countries (international).

Most of the articles were conceptual (n=7, 54%), followed by articles with an application (n=4, 31%) and one article reported on a development (n=1, 8%). One article was a combination of the three categories (n=1, 8%).

#### Agenda item 6: Building an information platform

A total of 83 articles reported on information platforms. A majority of the platform users were healthcare providers (n=47, 57%), followed by patients (n=25, 30%). Ten percent of the articles reported the use of real-time outcome information (n=8, 10%) (Table 7). Thirteen articles reported on telemedicine (16%), ten on e-health (12%) and eight on telehealth (10%).

Most of the articles were conceptual (n=50, 60%), followed by articles with an application (n=23, 28%) and articles with a development (n=5, 6%). Five articles were a combination of the three categories (n=5, 6%).

**Table 7: In-depth information regarding the strategic agenda items.**

| <b>Agenda item 1: Organizing into IPU (n=71)</b>       |                                           | <b>N (%)</b> |
|--------------------------------------------------------|-------------------------------------------|--------------|
| <b>Phase of IPU<sup>#</sup></b>                        | Design                                    | 15 (21)      |
|                                                        | Implementation                            | 3 (4)        |
|                                                        | Evaluation of implementation              | 25 (35)      |
|                                                        | Other                                     | 7 (10)       |
|                                                        | Not applicable                            | 23 (32)      |
| <b>Scale in organization</b>                           | In the whole organization                 | 3 (4)        |
|                                                        | Around one disease                        | 32 (45)      |
|                                                        | Other                                     | 7 (10)       |
|                                                        | Not applicable                            | 26 (37)      |
|                                                        | Unknown                                   | 3 (4)        |
| <b>Team</b>                                            | Yes, the team is multidisciplinary        | 43 (61)      |
|                                                        | No, the team has one discipline/specialty | 1 (1)        |
|                                                        | Not applicable                            | 19 (27)      |
|                                                        | Unknown                                   | 8 (11)       |
| <b>Agenda item 2: Measuring outcomes/costs (n=941)</b> |                                           | <b>N (%)</b> |
| <b>Outcome set developed</b>                           | Yes                                       | 63 (7)       |
| <b>PROM developed</b>                                  | Yes                                       | 13 (1)       |
| <b>Types of costs measured</b>                         | Direct costing *                          | 274 (29)     |

|                                                                |                               |          |
|----------------------------------------------------------------|-------------------------------|----------|
|                                                                | Indirect costing <sup>§</sup> | 2 (<1)   |
|                                                                | Direct and indirect costing   | 40 (4)   |
|                                                                | Other                         | 14 (1)   |
|                                                                | None / Not applicable         | 596 (63) |
|                                                                | Unknown                       | 15 (2)   |
| <b>Entire chain</b>                                            | Yes                           | 66 (20)  |
| <b>Agenda item 3: Moving to bundled payments (n=84)</b>        |                               | N (%)    |
| <b>Type of contracting<sup>#</sup></b>                         | Pay-for-performance bonuses   | 26 (31)  |
|                                                                | Bundled payments              | 66 (79)  |
|                                                                | Population-based payments     | 7 (8)    |
|                                                                | Other                         | 17 (20)  |
| <b>Agenda item 6: Building an information platforms (n=83)</b> |                               | N (%)    |
| <b>User of platform<sup>#</sup></b>                            | Healthcare professionals      | 47 (57)  |
|                                                                | Patients                      | 25 (30)  |
|                                                                | Management                    | 9 (11)   |
|                                                                | Administrative department     | 7 (8)    |
|                                                                | Financial department          | 4 (5)    |
|                                                                | Other                         | 7 (8)    |
|                                                                | Not applicable                | 24 (29)  |
|                                                                | Unknown                       | 5 (6)    |
| <b>Real time</b>                                               | Yes                           | 8 (10)   |
| <b>Telemedicine/telehealth/e-health<sup>#</sup></b>            | Telemedicine <sup>^</sup>     | 13 (16)  |
|                                                                | E-health <sup>^</sup>         | 10 (12)  |
|                                                                | Telehealth <sup>^</sup>       | 8 (10)   |
|                                                                | Other                         | 15 (18)  |
|                                                                | None                          | 37 (45)  |
|                                                                | Unknown                       | 2 (2)    |

<sup>#</sup>Total is more than 100% because multiple answers could be selected. <sup>\*</sup>The definition of direct costing used: "the costs associated with medical resource utilization, which include the consumption of in-patient, out-patient, and pharmaceutical services within the health care delivery system."<sup>18</sup> <sup>§</sup>The definition of indirect costing used: "the expenses incurred from the cessation or reduction of work productivity as a result of the morbidity and mortality associated with a given disease."<sup>18</sup> <sup>^</sup>*Telemedicine*: the provision of medical care with the use of communication technologies to connect healthcare providers and patients who are in different locations.<sup>19</sup> *Telehealth*: broader scope and includes patient education, public health and in-service training for healthcare professionals.<sup>19</sup> *e-Health*: applications in which internet technology is used to offer information, products and/or services in healthcare.<sup>19</sup>

## Discussion

### *Main findings*

This review showed that the extent, range and nature of VBHC research is large and still increasing; over the last fifteen years more than 1200 articles reported on VBHC. They described (the implementation of) the strategic agenda items within various specialties. The number of published articles increased each year, especially since 2013, with the exception of 2018. Most articles were published in the United States/North America, followed by Europe.

The majority of articles described the measurement of outcomes and costs. Other agenda items were far less frequently described or implemented. Most of the articles were conceptual, meaning that nothing was actually changed or implemented. When looking at the role that VBHC played in the articles, almost half of the articles discussed or implemented one or more agenda items; only five articles described or implemented all agenda items. Most articles were published from surgical specialties. Four main observations on these results are highlighted in the following paragraphs.

First, research on VBHC focused primarily on the agenda item “measuring outcomes and costs”. Furthermore, this agenda item had a relatively high ratio (52%) of application articles, meaning that outcomes and costs were actually measured. All other agenda items were reported on in a more conceptual way, without actually implementing or applying anything. The predominant focus on outcomes and costs might be explained by the formulation of the value definition, in which outcomes and costs are both specifically mentioned. Furthermore, it seems relatively difficult to implement other agenda items such as bundled payments of IPU without measuring outcomes and costs (value). The importance of measuring outcomes and costs has also been recognized in other quality of care concepts such as the Donabedian model.<sup>20</sup> Another explanation for the popularity of measuring outcomes and cost could be the clarity of this agenda item; this item is the least susceptible to interpretation differences. Additionally, Porter stated that measuring outcomes is the most important step and he dedicated a practical article on standard outcome sets,<sup>5</sup> which further facilitates the focus on measuring outcomes and costs. The types of outcomes and costs that were measured differed between continents. North America more often measured costs than Europe. Moreover, in the United States, VBHC was often used in the context of health care funding laws that place emphasis on curbing cost growth such as the Affordable Care Act (ACA). One of the goals of ACA was to expand healthcare coverage and to make healthcare

1  
2  
3 affordable to more citizens.<sup>21</sup> This focus on costs and payment methods might explain the  
4 higher number of articles measuring costs in North America.  
5

6  
7 Second, the current strategic agenda seemed to be incomplete. In 18% of the included  
8 articles, none of the current agenda items were discussed. Based on the issues that were  
9 addressed in these articles, we proposed four new agenda items: 'quality improvement',  
10 'VBHC culture', 'shared decision making', and 'education'. These four agenda items matched  
11 the new agenda items that were recently suggested.<sup>22</sup> It is important to note that some of the  
12 new agenda items, such as shared-decision making, were discussed in many of the included  
13 articles. However, in our methods, a new agenda item was only suggested by the reviewers  
14 when none of the current agenda items were checked in the data-extraction form. Thus, the  
15 number of articles with new agenda items were underreported.  
16  
17

18  
19 Third, there was a scarcity of articles on implementation of agenda items. Only a  
20 quarter of the included articles described an implementation. The majority of these articles  
21 focused on one agenda item. Few articles described implementation of multiple agenda items.  
22 The lack of implementation articles was in line with other research in hospital settings; Reitblat  
23 et al. concluded that the implementation and investigation of the strategic agenda in urology  
24 was limited<sup>23</sup> and another scoping review specifically focusing on VBHC implementation in  
25 hospital settings showed the same scarcity.<sup>24</sup> One reason for the lack of implementation  
26 articles might be the absence of a practical implementation guide for VBHC. The need for a  
27 road map that addresses the required steps for organizational changes has been  
28 acknowledged before.<sup>10</sup> Currently, this road map with practical steps is still missing and the  
29 available VBHC theory is interpreted in various ways.<sup>25</sup> This could lead to an inadequate  
30 implementation, as an ill-defined management intervention is often implemented in different  
31 ways.<sup>26</sup> Furthermore, it was argued that a low level of understanding might result in a dilution  
32 of the concept.<sup>7</sup> Therefore, it seems especially important to describe and observe different  
33 implementation initiatives around the world, to ultimately create a guideline for each  
34 healthcare contexts.  
35  
36

37  
38 Finally, it was striking that many of the included articles were focused on surgical  
39 specialties. A possible explanation is that these specialties have a longer history of quality  
40 registries (including outcome measures) and generally perform intervention-driven studies.  
41 Intervention-driven studies often compare health outcomes between interventions or patient  
42 groups. As a result, surgical articles focused more on health outcomes and linked this to the  
43  
44  
45  
46  
47  
48  
49  
50  
51  
52  
53  
54  
55  
56  
57  
58  
59  
60

1  
2  
3 VBHC concept and the definition of value; outcomes compared to costs. Another reason could  
4 be that VBHC principles are easier to implement in surgery as there is a more direct relation  
5 between intervention and outcomes.  
6  
7  
8  
9

### 10 *Strengths and limitations*

11 Some limitations need to be considered when interpreting the results of this study. First, the  
12 search strategy did not specifically include search terms for each agenda item, which could  
13 have resulted in selection bias. Second, using the article "What is value in health care?"<sup>15</sup> for  
14 the cited reference search, might have resulted in the overrepresentation of articles focusing  
15 on measuring value, outcomes or costs. Though, the representation of "What is value in health  
16 care" and other references to Porter found in our study is similar to the representation found  
17 in PubMed. Finally, inherent to the design of a scoping review, the included articles were not  
18 assessed for its research quality.  
19  
20  
21  
22  
23  
24  
25

26 A major strength of this review is its broad scope. The present study provides a  
27 comprehensive overview including items such as medical specialties, countries and all  
28 strategic agenda items (including potential new ones) (Supplementary File II). In addition, the  
29 study's exclusion criteria deliberately generated a broad picture of the current state of  
30 research on VBHC. This has resulted in a complete picture of the current state of research on  
31 VBHC. The broad scope of this study was especially important in light of the different  
32 interpretations of the VBHC concept. Finally, to date, hardly any reviews on VBHC have been  
33 published, and existing reviews focusing on for example articles with an implementation of  
34 VBHC.<sup>24</sup>  
35  
36  
37  
38  
39  
40  
41  
42  
43  
44

### 45 *Implications for clinical practice and/or research*

46 With the exception of measuring outcomes and costs, few articles have implemented and  
47 researched the implementation of strategic agenda items. There is a need for studies that  
48 evaluate the implementation of the different strategic agenda items within different medical  
49 specialties. Insight in practical implementation is needed in order to work towards a roadmap  
50 for step-by-step implementation of VBHC. It is important to collect evidence from daily  
51 practice to serve the evidence-based paradigm of the healthcare sector. To contribute to more  
52 evidence, our database (Supplementary File II) can be used for in-depth systematic reviews to  
53 further explore what is known within each of the agenda items.  
54  
55  
56  
57  
58  
59  
60

## Conclusion

This study showed that the number of publications steadily increased after the introduction of VBHC in 2006. The largest output came from North America, followed by Europe. There was a predominant focus on measuring outcomes and costs. In addition, almost one fifth of the articles could not be categorized in one of the items of the strategic agenda, which may lead to the conclusion that the current strategic agenda could be extended. Topics such as 'quality improvement', 'VBHC culture', 'shared decision making', and 'education' were proposed as potential new agenda items. Furthermore, there was a scarcity of articles with a practical implementation, leading to the conclusion that a practical roadmap or guideline to implement VBHC is still lacking. And last, many of the included articles were focused on surgical specialties. Future research could fill the gap by specifically researching the evidence on VBHC's effectiveness in day-to-day clinical practice.

## Acknowledgements

First, we would like to thank Nienke van der Werf, information specialist at the Antonius Academy, for her help in setting up the search strategy for the three databases. In addition, we would like to thank Oscar van Staveren of the Antonius Academy for his help in finding the articles we wanted to screen full-text.

## Funding

This research received no specific grant from any funding agency in the public, commercial or not-for-profit sectors.

## Competing interests

None declared.

## Author Contributions

Design of the review: JRGV, KD, MMG, MBVRVDV, DHB, WJWB, FVM, PBVDN

Data collection: JRGV, KD, GS, MMG, PBVDN

Data analysis and interpretation: JRGV, KD, MMG

Drafting the article: JRGV, KD, GS, MMG, PBVDN

1  
2  
3 Critical revision of the article: All authors

4  
5 Final approval of the version to be published: All authors

6  
7  
8 **Patient consent**

9  
10 None required.

11  
12  
13 **Data sharing statement**

14  
15 There is no additional unpublished data from this review.  
16  
17  
18  
19  
20  
21  
22  
23  
24  
25  
26  
27  
28  
29  
30  
31  
32  
33  
34  
35  
36  
37  
38  
39  
40  
41  
42  
43  
44  
45  
46  
47  
48  
49  
50  
51  
52  
53  
54  
55  
56  
57  
58  
59  
60



## References

1. Porter ME, Teisberg EO. Redefining Health Care: Creating Value-based Competition on Results: Harvard Business Review Press 2006.
2. Porter ME. Value-based health care delivery. *Ann Surg* 2008;248(4):503-9. doi: 10.1097/SLA.0b013e31818a43af [published Online First: 2008/10/22]
3. Porter ME, Lee TH. The strategy that will fix health care. *Harvard Business Review* 2013;91(OCT):50-+.
4. Cossio-Gil Y, Omara M, Watson C, et al. The Roadmap for Implementing Value-Based Healthcare in European University Hospitals—Consensus Report and Recommendations. *Value in Health* 2021 doi: <https://doi.org/10.1016/j.jval.2021.11.1355>
5. Porter ME. What is value in health care? *N Engl J Med* 2010;363(26):2477-81. doi: 10.1056/NEJMp1011024 [published Online First: 2010/12/15]
6. Google Scholar - Citations "What is value in health care?" - M.E. Porter.
7. Fredriksson JJ, Ebbevi D, Savage C. Pseudo-understanding: an analysis of the dilution of value in healthcare. *BMJ Qual Saf* 2015;24(7):451-7. doi: 10.1136/bmjqs-2014-003803 [published Online First: 2015/05/16]
8. Peters M, Godfrey C, McInerney P, et al. Chapter 11: Scoping Reviews. *JBI Manual for Evidence Synthesis*: JBI 2020.
9. Kaplan RS, Porter ME. How to solve the cost crisis in health care. *Harv Bus Rev* 2011;89(9):46-52.
10. Porter ME. A strategy for health care reform--toward a value-based system. *N Engl J Med* 2009;361(2):109-12. doi: 10.1056/NEJMp0904131. Epub 2009 Jun 3. [published Online First: 2009/06/06]
11. Porter ME, Larsson S, Lee TH. Standardizing Patient Outcomes Measurement. *N Engl J Med* 2016;374(6):504-6. doi: 10.1056/NEJMp1511701 [published Online First: 2016/02/11]
12. <http://rayyan.qcri.org>.
13. Harris PA, Taylor R, Minor BL, et al. The REDCap consortium: Building an international community of software platform partners. *J Biomed Inform* 2019;95:103208. doi: 10.1016/j.jbi.2019.103208 [published Online First: 2019/05/13]
14. Harris PA, Taylor R, Thielke R, et al. Research electronic data capture (REDCap)—a metadata-driven methodology and workflow process for providing translational research informatics support. *Journal of biomedical informatics* 2009;42(2):377-81.
15. Page MJ, Moher D, Bossuyt PM, et al. PRISMA 2020 explanation and elaboration: updated guidance and exemplars for reporting systematic reviews. *BMJ* 2021;372:n160. doi: 10.1136/bmj.n160 [published Online First: 2021/03/31]
16. Porter M, Teisberg E. How physicians can change the future of health care. *JAMA* 2007;1103-11.
17. <https://www.abms.org/member-boards/specialty-subspecialty-certificates/> [
18. Boccuzzi SJ. Indirect health care costs. *Cardiovascular health care economics*: Springer 2003:63-79.
19. Fatehi F, Wootton R. Telemedicine, telehealth or e-health? A bibliometric analysis of the trends in the use of these terms. *J Telemed Telecare* 2012;18(8):460-4. doi: 10.1258/jtt.2012.gth108 [published Online First: 2012/12/05]
20. Donabedian A. Evaluating the quality of medical care. *Milbank Mem Fund Q* 1966;44(3):Suppl:166-206. [published Online First: 1966/07/01]

- 1
  - 2
  - 3
  - 4
  - 5
  - 6
  - 7
  - 8
  - 9
  - 10
  - 11
  - 12
  - 13
  - 14
  - 15
  - 16
  - 17
  - 18
  - 19
  - 20
  - 21
  - 22
  - 23
  - 24
  - 25
  - 26
  - 27
  - 28
  - 29
  - 30
  - 31
  - 32
  - 33
  - 34
  - 35
  - 36
  - 37
  - 38
  - 39
  - 40
  - 41
  - 42
  - 43
  - 44
  - 45
  - 46
  - 47
  - 48
  - 49
  - 50
  - 51
  - 52
  - 53
  - 54
  - 55
  - 56
  - 57
  - 58
  - 59
  - 60
21. <https://www.cms.gov/newsroom/fact-sheets/bundled-payments-care-improvement-initiative-bpci-fact-sheet> [
22. van der Nat PB. The new strategic agenda for value transformation. *Health Serv Manage Res* 2021;9514848211011739. doi: 10.1177/09514848211011739 [published Online First: 2021/04/27]
23. Reitblat C, Bain PA, Porter ME, et al. Value-Based Healthcare in Urology: A Collaborative Review. *European Urology* 2021
24. van Staaldunen DJ, van den Bekerom P, Groeneveld S, et al. The implementation of value-based healthcare: a scoping review. *BMC health services research* 2022;22(1):1-8.
25. Steinmann G, van de Bovenkamp H, de Bont A, et al. Redefining value: a discourse analysis on value-based health care. *BMC Health Serv Res* 2020;20(1):862. doi: 10.1186/s12913-020-05614-7 [published Online First: 2020/09/16]
26. Colldén C, Hellström A. Value-based healthcare translated: a complementary view of implementation. *BMC health services research* 2018;18(1):1-11.

1  
2  
3 **Figure legends**  
4

5 Figure 1: Flowchart with review decision process.  
6

7 Figure 2: Bar chart with number of publications over the years. NB: the search was  
8 conducted in June 2021.  
9  
10  
11  
12  
13  
14  
15  
16  
17  
18  
19  
20  
21  
22  
23  
24  
25  
26  
27  
28  
29  
30  
31  
32  
33  
34  
35  
36  
37  
38  
39  
40  
41  
42  
43  
44  
45  
46  
47  
48  
49  
50  
51  
52  
53  
54  
55  
56  
57  
58  
59  
60

For peer review only

## Identification of studies via databases and registers

### Identification

Records identified from:  
Databases  
(PubMed n=5.128  
Embase n=6.213  
Web of Science n=14.372  
Citation searching n=2.218)

Records removed before  
screening:  
Duplicate records removed  
(n=15.022)

### Screening

Records screened  
(n=12.909)

Records excluded  
(n=8.078)

Reports sought for retrieval  
(n=4.831)

Reports not retrieved  
(n=10)

Reports assessed for  
eligibility  
(n=4.821)

Reports excluded:  
Not on VBHC (n=3.501)  
Not a peer-reviewed article  
(n=74)

### Included

Studies included in review  
(n=1.246)

Reports excluded from  
analysis:  
Source reports (n=4)

Studies analysed in review  
(n=1.242)

1  
2  
3  
4  
5  
6  
7  
8  
9  
10  
11  
12  
13  
14  
15  
16  
17  
18  
19  
20  
21  
22  
23  
24  
25  
26  
27  
28  
29  
30  
31  
32  
33  
34  
35  
36  
37  
38  
39  
40  
41  
42  
43  
44  
45  
46

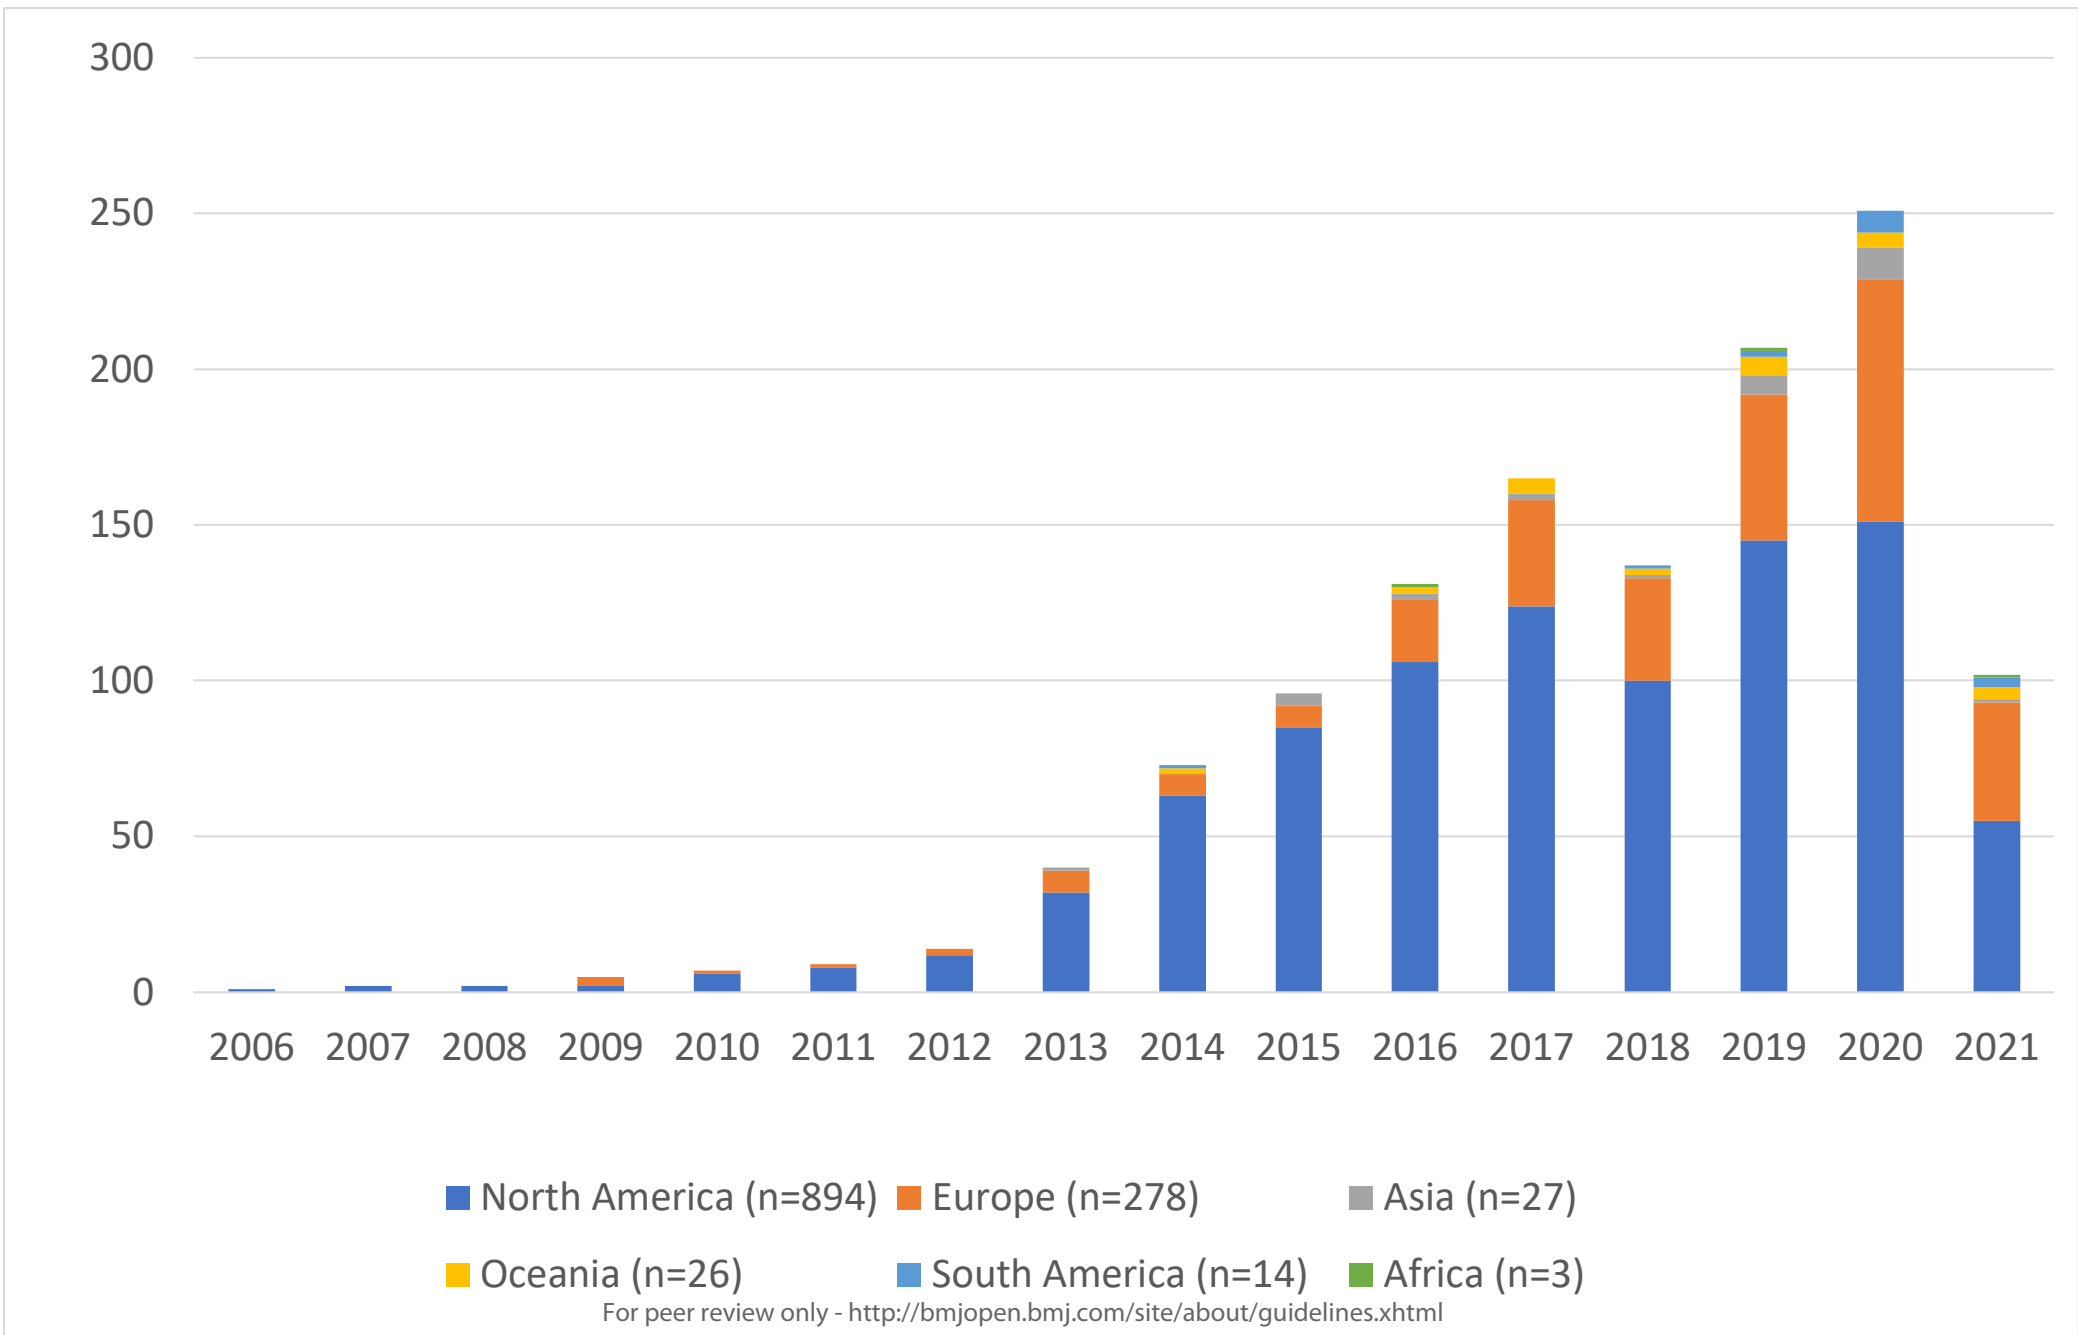

## Supplementary file I

The electronic search strategy used for PubMed.

*("VBHC"[tiab] OR "value-added care"[tiab] OR "value added care"[tiab] OR "value-added healthcare"[tiab] OR "value added healthcare"[tiab]*

*OR*

*((("Delivery of Health Care"[Mesh] OR "Health Care"[tiab] OR "healthcare"[tiab] OR "care"[tiab] OR "Costs and Cost Analysis"[Mesh] OR "cost"[tiab] OR "costs"[tiab] OR "pricing"[tiab] OR "payment"[tiab] OR "payments"[tiab] OR "purchasing"[tiab] OR "expenditure"[tiab] OR "expenditures"[tiab] OR "economic"[tiab] OR "economics"[tiab] OR "insurance"[tiab] OR "Quality of Health Care"[Mesh] OR "outcome"[tiab] OR "outcomes"[tiab] OR "PROMS"[ti] OR "indicator"[tiab] OR "indicators"[tiab] OR "benchmark"[tiab] OR "benchmarking"[tiab] OR "best practice"[tiab] OR "best practices"[tiab] OR "Integrated Practice units"[tiab] OR "IPU"[ti] OR "lean"[tiab] OR "six sigma"[tiab] OR "six sigmas"[tiab] OR "management"[tiab] OR "organisation"[tiab] OR "organization"[tiab] OR "Contracts"[Mesh] OR "contracting"[tiab] OR "contract"[tiab] OR "contracts"[tiab]))*

*AND*

*("value-based"[tiab] OR "value based"[tiab]))*

*AND*

*(("2006/01/01"[PDat]: "2030/12/31"[PDat]))*



1  
2  
3  
4  
5  
6  
7  
8  
9  
10  
11  
12  
13  
14  
15  
16  
17  
18  
19  
20  
21  
22  
23  
24  
25  
26  
27  
28  
29  
30  
31  
32  
33  
34  
35  
36  
37  
38  
39  
40  
41  
42  
43  
44  
45  
46

Table with columns for article ID, title, authors, journal name, publication date, and various status/availability checkboxes. The table contains multiple rows of data corresponding to the line numbers 1-46 on the left.







1
2
3
4
5
6
7
8
9
10
11
12
13
14
15
16
17
18
19
20
21
22
23
24
25
26
27
28
29
30
31
32
33
34
35
36
37
38
39
40
41
42
43
44
45
46

Table with multiple columns containing text, numbers, and status indicators (e.g., Unchecked, Checked, Unavailable). Includes a large 'Preprint' watermark across the center.

1  
2  
3  
4  
5  
6  
7  
8  
9  
10  
11  
12  
13  
14  
15  
16  
17  
18  
19  
20  
21  
22  
23  
24  
25  
26  
27  
28  
29  
30  
31  
32  
33  
34  
35  
36  
37  
38  
39  
40  
41  
42  
43  
44  
45  
46

| Author                                                                                                                                                                                                                                                                                                                                                                                                                                                                                                                                                                                                                                                                                                                                                                                                                                                                                                                                                                                                                                                                                                                                                                                                                                                                                                                                                                                                                                                                                                                                                                                                                                                                                                                                                                                                                                                                                                                                                 | Year | Journal | Design | Setting | Population | Intervention | Comparison | Outcomes | Quality | Notes |
|--------------------------------------------------------------------------------------------------------------------------------------------------------------------------------------------------------------------------------------------------------------------------------------------------------------------------------------------------------------------------------------------------------------------------------------------------------------------------------------------------------------------------------------------------------------------------------------------------------------------------------------------------------------------------------------------------------------------------------------------------------------------------------------------------------------------------------------------------------------------------------------------------------------------------------------------------------------------------------------------------------------------------------------------------------------------------------------------------------------------------------------------------------------------------------------------------------------------------------------------------------------------------------------------------------------------------------------------------------------------------------------------------------------------------------------------------------------------------------------------------------------------------------------------------------------------------------------------------------------------------------------------------------------------------------------------------------------------------------------------------------------------------------------------------------------------------------------------------------------------------------------------------------------------------------------------------------|------|---------|--------|---------|------------|--------------|------------|----------|---------|-------|
| Table 6. A randomised controlled trial...<br>Table 7. A randomised controlled trial...<br>Table 8. A randomised controlled trial...<br>Table 9. A randomised controlled trial...<br>Table 10. A randomised controlled trial...<br>Table 11. A randomised controlled trial...<br>Table 12. A randomised controlled trial...<br>Table 13. A randomised controlled trial...<br>Table 14. A randomised controlled trial...<br>Table 15. A randomised controlled trial...<br>Table 16. A randomised controlled trial...<br>Table 17. A randomised controlled trial...<br>Table 18. A randomised controlled trial...<br>Table 19. A randomised controlled trial...<br>Table 20. A randomised controlled trial...<br>Table 21. A randomised controlled trial...<br>Table 22. A randomised controlled trial...<br>Table 23. A randomised controlled trial...<br>Table 24. A randomised controlled trial...<br>Table 25. A randomised controlled trial...<br>Table 26. A randomised controlled trial...<br>Table 27. A randomised controlled trial...<br>Table 28. A randomised controlled trial...<br>Table 29. A randomised controlled trial...<br>Table 30. A randomised controlled trial...<br>Table 31. A randomised controlled trial...<br>Table 32. A randomised controlled trial...<br>Table 33. A randomised controlled trial...<br>Table 34. A randomised controlled trial...<br>Table 35. A randomised controlled trial...<br>Table 36. A randomised controlled trial...<br>Table 37. A randomised controlled trial...<br>Table 38. A randomised controlled trial...<br>Table 39. A randomised controlled trial...<br>Table 40. A randomised controlled trial...<br>Table 41. A randomised controlled trial...<br>Table 42. A randomised controlled trial...<br>Table 43. A randomised controlled trial...<br>Table 44. A randomised controlled trial...<br>Table 45. A randomised controlled trial...<br>Table 46. A randomised controlled trial... |      |         |        |         |            |              |            |          |         |       |

| Variable                                                                                                          | Field label                                                          | Options                                                                                                                                                                                                                                                                                        |
|-------------------------------------------------------------------------------------------------------------------|----------------------------------------------------------------------|------------------------------------------------------------------------------------------------------------------------------------------------------------------------------------------------------------------------------------------------------------------------------------------------|
| <b>Country of origin of the article</b>                                                                           | What was the country of origin of the article?                       | <i>dropdown, Required</i>                                                                                                                                                                                                                                                                      |
| <b>Type of article</b>                                                                                            | What type of article was written?                                    | <i>radio, Required:</i><br>Original article<br>Literature review (scoping or systematic)<br>Short report / Brief communications / Perspective / Commentary / Opinion paper / Narrative review<br>Case study<br>Methodology<br>Other                                                            |
| <b>Population type researched</b><br>Show the field ONLY if:<br>[method]="1" AND [type_article]= original article | What population did the article research?                            | <i>checkbox, Required:</i><br>Patients<br>Healthcare professionals<br>Not applicable<br>Other                                                                                                                                                                                                  |
| <b>Research method</b><br>Show the field ONLY if:<br>[method]="1" AND [type_article]= original article            | Was the research method of the article qualitative or quantitative?  | <i>radio, Required:</i><br>Quantitative<br>Qualitative<br>Both<br>NA<br>Unknown                                                                                                                                                                                                                |
| <b>Type of outcome measured</b><br>Show the field ONLY if:<br>[method]="1" AND [type_article]= original article   | What type of outcomes were measured in the article?                  | <i>checkbox, Required:</i><br>Patient-reported outcome measures (PROMs) (including questionnaires on disease symptoms, functional ability, quality of life)<br>Clinician reported outcomes (clinical outcomes)<br>Patient-reported experience measures (PREMs)<br>Costs<br>None<br>Other<br>NA |
| <b>Type of PROMs</b><br>Show the field ONLY if:<br>[type_of_outcomes(1)] = PROMs                                  | Which PROMs were measured?                                           | <i>radio, Required:</i><br>Generic PROMs<br>Specific PROMs<br>Both<br>Other<br>Unknown<br>NA                                                                                                                                                                                                   |
| <b>Standard set used</b><br>Show the field ONLY if:<br>[method]="1" AND [type_article]= original article          | Was a standard set used to measure outcomes?                         | <i>radio, Required:</i><br>Yes, ICHOM<br>Yes, COMET<br>Other<br>No<br>Unknown<br>NA                                                                                                                                                                                                            |
| <b>Study design</b><br>Show the field ONLY if:<br>[method]="1" AND [type_article]= original article               | Was the design of the article observational or experimental?         | <i>radio, Required:</i><br>Observational<br>Experimental<br>Both<br>NA<br>Unknown                                                                                                                                                                                                              |
| <b>Data collection</b><br>Show the field ONLY if:<br>[study_design] = observational OR [study_design] = both      | Was the data collection of the article retrospective or prospective? | <i>radio, Required:</i><br>Retrospective<br>Prospective                                                                                                                                                                                                                                        |

|                                                                        |                                                                                                                                                    |                                                                                                                                                                                                                                                                                                                           |
|------------------------------------------------------------------------|----------------------------------------------------------------------------------------------------------------------------------------------------|---------------------------------------------------------------------------------------------------------------------------------------------------------------------------------------------------------------------------------------------------------------------------------------------------------------------------|
|                                                                        |                                                                                                                                                    | Both (Retro+pro)<br>NA<br>Unknown<br>Cross-sectional                                                                                                                                                                                                                                                                      |
| <b>Medical specialty</b>                                               | Which medical specialty was mainly researched in the article?                                                                                      | <i>text, Required</i>                                                                                                                                                                                                                                                                                                     |
| <b>Level of VBHC</b>                                                   | On what level did the article report on VBHC?                                                                                                      | <i>radio, Required:</i><br>1. Describe or implement multiple agenda items (highest extent)<br>2. Describe or implement a specific part of VBHC or the strategic agenda<br>3. Discuss how to improve value or measure value, with value defined<br>4. VBHC is context or motivation for the study (lowest extent)<br>Other |
| <b>Type of article 2 (concept/development/application)</b>             | Was it a conceptual article or an development article or an application article?                                                                   | <i>checkbox, Required:</i><br>Conceptual article<br>Development of application (not applicated, but developed)<br>Article with an application<br>Other<br>NA                                                                                                                                                              |
| <b>Agenda item = IPU</b>                                               | Section Header: <i>Were the agenda items researched?</i><br>Organize into integrated practice units (IPUs) around the patient's medical condition. | <i>radio (Matrix), Required:</i><br>Yes, researched<br>No, not researched<br>Unknown                                                                                                                                                                                                                                      |
| <b>Agenda item = Outcomes and Costs</b>                                | Measure outcomes and costs for every patient.                                                                                                      | <i>radio (Matrix), Required:</i><br>Yes, researched<br>No, not researched<br>Unknown                                                                                                                                                                                                                                      |
| <b>Agenda item = Bundled Payments</b>                                  | Move to bundled payments for care cycles.                                                                                                          | <i>radio (Matrix), Required:</i><br>Yes, researched<br>No, not researched<br>Unknown                                                                                                                                                                                                                                      |
| <b>Agenda item = Across Separate Facilities</b>                        | Integrate care delivery across separate facilities.                                                                                                | <i>radio (Matrix), Required:</i><br>Yes, researched<br>No, not researched<br>Unknown                                                                                                                                                                                                                                      |
| <b>Agenda item = Across Geography</b>                                  | Expand excellent services across geography.                                                                                                        | <i>radio (Matrix), Required:</i><br>Yes, researched<br>No, not researched<br>Unknown                                                                                                                                                                                                                                      |
| <b>Agenda item = Information Platform</b>                              | Build an enabling information technology platform.                                                                                                 | <i>radio (Matrix), Required:</i><br>Yes, researched<br>No, not researched<br>Unknown                                                                                                                                                                                                                                      |
| <b>Other type of contracting</b>                                       | Was other type of contracting researched?                                                                                                          | <i>radio (Matrix), Required:</i><br>Yes, researched<br>No, not researched<br>Unknown                                                                                                                                                                                                                                      |
| <b>Phase IPU</b><br>Show the field ONLY if:<br>[ipu] = Yes, researched | What was the phase of the IPU researched?                                                                                                          | <i>checkbox, Required:</i><br>Design<br>Implementation<br>Evaluation of implementation<br>Unknown<br>Other                                                                                                                                                                                                                |

|    |                                                |                                                             |                                           |
|----|------------------------------------------------|-------------------------------------------------------------|-------------------------------------------|
| 1  |                                                |                                                             | NA                                        |
| 2  | <b>Scale of IPU</b>                            | On which scale in the organization was the IPU implemented? | <i>radio, Required:</i>                   |
| 3  | Show the field ONLY if:                        |                                                             | In the whole organization                 |
| 4  | [ipu] = Yes, researched                        |                                                             | Around one disease                        |
| 5  |                                                |                                                             | Other                                     |
| 6  |                                                |                                                             | Unknown                                   |
| 7  |                                                |                                                             | NA                                        |
| 8  | <b>Multidisciplinary of team</b>               | Was the team in the IPU multidisciplinary?                  | <i>radio, Required:</i>                   |
| 9  | Show the field ONLY if:                        |                                                             | Yes, the team is multidisciplinary        |
| 10 | [ipu] = Yes, researched                        |                                                             | No, the team has one discipline/specialty |
| 11 |                                                |                                                             | Other                                     |
| 12 |                                                |                                                             | Unknown                                   |
| 13 |                                                |                                                             | NA                                        |
| 14 | <b>Outcome set or PROMs developed</b>          | Was an outcome set or PROMs developed?                      | <i>radio, Required:</i>                   |
| 15 | Show the field ONLY if:                        |                                                             | Yes, an outcome set                       |
| 16 | [outcomes_costs] = Yes, researched             |                                                             | Yes, PROMs                                |
| 17 |                                                |                                                             | No                                        |
| 18 |                                                |                                                             | Unknown                                   |
| 19 | <b>Type of costs</b>                           | What type of costs were measured?                           | <i>checkbox, Required:</i>                |
| 20 | Show the field ONLY if:                        |                                                             | Direct cost                               |
| 21 | [outcomes_costs] = Yes, researched             |                                                             | Indirect cost                             |
| 22 |                                                |                                                             | Other                                     |
| 23 |                                                |                                                             | None                                      |
| 24 |                                                |                                                             | Unknown                                   |
| 25 |                                                |                                                             | NA                                        |
| 26 | <b>Collaborating facility</b>                  | Which parties collaborated across the separate facilities?  | <i>checkbox, Required:</i>                |
| 27 | Show the field ONLY if:                        |                                                             | Healthcare provider / hospital            |
| 28 | [across_separate_facilities] = Yes, researched |                                                             | Insurance company                         |
| 29 |                                                |                                                             | University                                |
| 30 |                                                |                                                             | Research center                           |
| 31 |                                                |                                                             | Pharmaceutical company                    |
| 32 |                                                |                                                             | Other                                     |
| 33 |                                                |                                                             | Unknown                                   |
| 34 |                                                |                                                             | NA                                        |
| 35 | <b>Expand national or international</b>        | Did the organization expand national or international?      | <i>checkbox, Required:</i>                |
| 36 | Show the field ONLY if:                        |                                                             | National expansion                        |
| 37 | [across_geography] = Yes, researched           |                                                             | International expansion                   |
| 38 |                                                |                                                             | Unknown                                   |
| 39 | <b>User of IT platform</b>                     | Who was the user of the information platform?               | <i>checkbox, Required:</i>                |
| 40 | Show the field ONLY if:                        |                                                             | Patients                                  |
| 41 | [information_platform] = Yes, researched       |                                                             | Healthcare professionals                  |
| 42 |                                                |                                                             | Management                                |
| 43 |                                                |                                                             | Administrative department                 |
| 44 |                                                |                                                             | Financial department                      |
| 45 |                                                |                                                             | Other                                     |
| 46 |                                                |                                                             | NA                                        |
|    |                                                |                                                             | Unknown                                   |
|    | <b>Type of contracting</b>                     | What type of contracting was discussed/used?                | <i>checkbox, Required:</i>                |
|    | Show the field ONLY if:                        |                                                             | Pay-for-performance bonuses               |
|    | [other_type_of_contracting] = Yes, researched  |                                                             | Bundled payments                          |
|    | OR [bundled_payments] = Yes, researched        |                                                             | Population-based payments                 |

1  
2  
3  
4  
5  
6  
7  
8  
9  
10  
11  
12  
13  
14  
15  
16  
17  
18  
19  
20  
21  
22  
23  
24  
25  
26  
27  
28  
29  
30  
31  
32  
33  
34  
35  
36  
37  
38  
39  
40  
41  
42  
43  
44  
45  
46

|         |
|---------|
| Other   |
| Unknown |

For peer review only



## Supplementary file III

| Medical specialty                           | N (%)                                   |        |
|---------------------------------------------|-----------------------------------------|--------|
| Allergy and immunology                      | 2 (<1)                                  |        |
| Anesthesiology                              | 38 (3)                                  |        |
| Colon and rectal surgery                    | 20 (2)                                  |        |
| Dermatology                                 | 9 (1)                                   |        |
| Emergency medicine                          | 10 (1)                                  |        |
| Family medicine                             | 4 (<1)                                  |        |
| Internal medicine                           |                                         |        |
|                                             | <i>Cardiology</i>                       | 35 (3) |
|                                             | <i>Endocrinology</i>                    | 3 (<1) |
|                                             | <i>Gastroenterology</i>                 | 33 (3) |
|                                             | <i>Geriatric medicine</i>               | 9 (1)  |
|                                             | <i>Hematology</i>                       | 8 (1)  |
|                                             | <i>Infectious disease</i>               | 8 (1)  |
|                                             | <i>Internal medicine general</i>        | 14 (1) |
|                                             | <i>Nephrology</i>                       | 8 (1)  |
|                                             | <i>Oncology</i>                         | 34 (3) |
|                                             | <i>Pulmonary disease</i>                | 14 (1) |
|                                             | <i>Rheumatology</i>                     | 10 (1) |
|                                             | <i>Sleep medicine</i>                   | 2 (<1) |
| Neurological surgery                        | 22 (2)                                  |        |
| Neurological surgery and orthopedic surgery | 18 (1)                                  |        |
| Neurology                                   | 20 (2)                                  |        |
| Obstetrics and gynecology                   | 26 (2)                                  |        |
| Ophthalmology                               | 12 (1)                                  |        |
| Orthopedic surgery                          | 182 (15)                                |        |
| Otolaryngology                              | 29 (2)                                  |        |
| Pathology                                   | 2 (<1)                                  |        |
| Pediatrics                                  |                                         |        |
|                                             | <i>Neonatal-perinatal medicine</i>      | 5 (<1) |
|                                             | <i>Pediatric cardiology</i>             | 12 (1) |
|                                             | <i>Pediatric critical care medicine</i> | 1 (<1) |
|                                             | <i>Pediatric endocrinology</i>          | 1 (<1) |
|                                             | <i>Pediatric gastroenterology</i>       | 1 (<1) |
|                                             | <i>Pediatrics general</i>               | 22 (2) |
|                                             | <i>Pediatric hematology-oncology</i>    | 1 (<1) |
|                                             | <i>Pediatric infectious diseases</i>    | 5 (<1) |
|                                             | <i>Pediatric pulmonology</i>            | 2 (<1) |
| Physical medicine and rehabilitation        | 20 (2)                                  |        |
| Plastic surgery                             | 31 (2)                                  |        |
| Psychiatry                                  | 16 (1)                                  |        |
| Radiology                                   |                                         |        |
|                                             | <i>Diagnostic radiology</i>             | 37 (3) |

|                  |                                  |          |
|------------------|----------------------------------|----------|
|                  | Radiation oncology               | 24 (2)   |
| Surgery          |                                  |          |
|                  | <i>Bariatric surgery</i>         | 3 (<1)   |
|                  | <i>General surgery</i>           | 93 (7)   |
|                  | <i>Oral surgery</i>              | 1 (<1)   |
|                  | <i>Pediatric surgery</i>         | 8 (1)    |
|                  | <i>Transplant surgery</i>        | 3 (<1)   |
|                  | <i>Trauma surgery</i>            | 3 (<1)   |
| Thoracic surgery |                                  | 31 (2)   |
| Urology          |                                  | 32 (3)   |
| NA               |                                  | 248 (20) |
| Multiple         |                                  | 18 (1)   |
| Other            |                                  |          |
|                  | <i>Other</i>                     | 3 (<1)   |
|                  | <i>Chronic health conditions</i> | 4 (<1)   |
|                  | <i>Clinical chemistry</i>        | 2 (<1)   |
|                  | <i>Dentistry</i>                 | 11 (1)   |
|                  | <i>Home care</i>                 | 2 (<1)   |
|                  | <i>Interventional radiology</i>  | 7 (1)    |
|                  | <i>Laboratory medicine</i>       | 7 (1)    |
|                  | <i>Palliative care</i>           | 2 (<1)   |
|                  | <i>Pharmacy</i>                  | 11 (1)   |
|                  | <i>Primary care</i>              | 2 (<1)   |
|                  | <i>Veterinary care</i>           | 1 (<1)   |

## Supplementary file IV

| Reference to Porter #,\$                                                                                                                                                                                                                        |          |
|-------------------------------------------------------------------------------------------------------------------------------------------------------------------------------------------------------------------------------------------------|----------|
| Porter, M. E. (2010). What is value in health care. <i>N Engl J Med</i> , 363(26), 2477-2481.                                                                                                                                                   | 953 (77) |
| Porter, M. E., & Teisberg, E. O. (2006). <i>Redefining health care: creating value-based competition on results</i> . Harvard business press.                                                                                                   | 208 (17) |
| Porter, M. E. (2009). A strategy for health care reform—toward a value-based system. <i>N Engl J Med</i> , 361(2), 109-112.                                                                                                                     | 150 (12) |
| Kaplan, R. S., & Porter, M. E. (2011). How to solve the cost crisis in health care. <i>Harv Bus Rev</i> , 89(9), 46-52.                                                                                                                         | 127 (10) |
| Porter, M. E., & Lee, T. H. (2013). The strategy that will fix health care. <i>Harvard business review</i> , 91(12), 24-24.                                                                                                                     | 113 (9)  |
| Porter, M. E., Larsson, S., & Lee, T. H. (2016). Standardizing patient outcomes measurement. <i>N Engl J Med</i> , 374(6), 504-506.                                                                                                             | 70 (6)   |
| Porter, M. E. (2008). Value-based health care delivery. <i>Annals of surgery</i> , 248(4), 503-509.                                                                                                                                             | 51 (4)   |
| Porter, M. E., & Teisberg, E. O. (2007). How physicians can change the future of health care. <i>Jama</i> , 297(10), 1103-1111.                                                                                                                 | 40 (3)   |
| Porter, M. E., & Teisberg, E. O. (2004). Redefining competition in health care. <i>Harvard business review</i> , 64-77.                                                                                                                         | 33 (3)   |
| Porter, M. E., Pabo, E. A., & Lee, T. H. (2013). Redesigning primary care: a strategic vision to improve value by organizing around patients' needs. <i>Health Affairs</i> , 32(3), 516-525.                                                    | 30 (2)   |
| Porter, M. E., & Lee, T. H. (2016). From volume to value in health care: the work begins. <i>Jama</i> , 316(10), 1047-1048.                                                                                                                     | 21 (2)   |
| Porter, M. E., & Kaplan, R. S. (2016). How to pay for health care. <i>Harv Bus Rev</i> , 94(7-8), 88-98.                                                                                                                                        | 13 (1)   |
| Porter, M. E., & Lee, T. H. (2015). Why strategy matters now. <i>N Engl J Med</i> , 372(18), 1681-1684.                                                                                                                                         | 12 (1)   |
| Porter, M. E. (1985). <i>Competitive Advantage: Creating and Sustaining Superior Performance</i> . New York: The Free Press. 557 p.                                                                                                             | 8 (1)    |
| Porter, M. E. (2008, August). Defining and introducing value in health care. In <i>Evidence-based medicine and the changing nature of health care: 2007 IOM annual meeting summary</i> (pp. 161-72). National Academies Press, Washington (DC). | 8 (1)    |
| Other articles*                                                                                                                                                                                                                                 | 101 (8)  |
| No ref                                                                                                                                                                                                                                          | 76 (6)   |
| Part of article with reference to Porter #,\$                                                                                                                                                                                                   |          |
| Introduction                                                                                                                                                                                                                                    | 564 (77) |
| Method                                                                                                                                                                                                                                          | 62 (8)   |
| Results                                                                                                                                                                                                                                         | 35 (5)   |
| Discussion                                                                                                                                                                                                                                      | 233 (32) |
| Conclusion                                                                                                                                                                                                                                      | 26 (4)   |
| Other                                                                                                                                                                                                                                           | 14 (2)   |

1  
2  
3 #Total is more than 100% because multiple answers could be selected. <sup>§</sup>58% (n=721) of the articles  
4 had one Porter reference, 36% of the articles had two or more references (mean: 2.6, range: 2-6).

5 \*This category contains 53 articles cited less than 8 times. <sup>§</sup>N=736, this question includes the articles  
6 with multiple section.  
7  
8  
9  
10  
11  
12  
13  
14  
15  
16  
17  
18  
19  
20  
21  
22  
23  
24  
25  
26  
27  
28  
29  
30  
31  
32  
33  
34  
35  
36  
37  
38  
39  
40  
41  
42  
43  
44  
45  
46  
47  
48  
49  
50  
51  
52  
53  
54  
55  
56  
57  
58  
59  
60

For peer review only

## Preferred Reporting Items for Systematic reviews and Meta-Analyses extension for Scoping Reviews (PRISMA-ScR) Checklist

| SECTION                           | ITEM | PRISMA-ScR CHECKLIST ITEM                                                                                                                                                                                                                                                                                  | REPORTED ON PAGE #               |
|-----------------------------------|------|------------------------------------------------------------------------------------------------------------------------------------------------------------------------------------------------------------------------------------------------------------------------------------------------------------|----------------------------------|
| <b>TITLE</b>                      |      |                                                                                                                                                                                                                                                                                                            |                                  |
| Title                             | 1    | Identify the report as a scoping review.                                                                                                                                                                                                                                                                   | 1                                |
| <b>ABSTRACT</b>                   |      |                                                                                                                                                                                                                                                                                                            |                                  |
| Structured summary                | 2    | Provide a structured summary that includes (as applicable): background, objectives, eligibility criteria, sources of evidence, charting methods, results, and conclusions that relate to the review questions and objectives.                                                                              | 2                                |
| <b>INTRODUCTION</b>               |      |                                                                                                                                                                                                                                                                                                            |                                  |
| Rationale                         | 3    | Describe the rationale for the review in the context of what is already known. Explain why the review questions/objectives lend themselves to a scoping review approach.                                                                                                                                   | 4 - 5                            |
| Objectives                        | 4    | Provide an explicit statement of the questions and objectives being addressed with reference to their key elements (e.g., population or participants, concepts, and context) or other relevant key elements used to conceptualize the review questions and/or objectives.                                  | 5 - 6                            |
| <b>METHODS</b>                    |      |                                                                                                                                                                                                                                                                                                            |                                  |
| Protocol and registration         | 5    | Indicate whether a review protocol exists; state if and where it can be accessed (e.g., a Web address); and if available, provide registration information, including the registration number.                                                                                                             | NA                               |
| Eligibility criteria              | 6    | Specify characteristics of the sources of evidence used as eligibility criteria (e.g., years considered, language, and publication status), and provide a rationale.                                                                                                                                       | 6                                |
| Information sources*              | 7    | Describe all information sources in the search (e.g., databases with dates of coverage and contact with authors to identify additional sources), as well as the date the most recent search was executed.                                                                                                  | 6                                |
| Search                            | 8    | Present the full electronic search strategy for at least 1 database, including any limits used, such that it could be repeated.                                                                                                                                                                            | Supplementary file I             |
| Selection of sources of evidence† | 9    | State the process for selecting sources of evidence (i.e., screening and eligibility) included in the scoping review.                                                                                                                                                                                      | 6 - 7                            |
| Data charting process‡            | 10   | Describe the methods of charting data from the included sources of evidence (e.g., calibrated forms or forms that have been tested by the team before their use, and whether data charting was done independently or in duplicate) and any processes for obtaining and confirming data from investigators. | 7                                |
| Data items                        | 11   | List and define all variables for which data were sought and any assumptions and simplifications made.                                                                                                                                                                                                     | Page 7 and Supplementary file II |
| Critical appraisal of individual  | 12   | If done, provide a rationale for conducting a critical appraisal of included sources of evidence; describe                                                                                                                                                                                                 | NA                               |

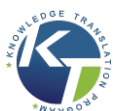

| SECTION                                       | ITEM | PRISMA-ScR CHECKLIST ITEM                                                                                                                                                                       | REPORTED ON PAGE #       |
|-----------------------------------------------|------|-------------------------------------------------------------------------------------------------------------------------------------------------------------------------------------------------|--------------------------|
| sources of evidence§                          |      | the methods used and how this information was used in any data synthesis (if appropriate).                                                                                                      |                          |
| Synthesis of results                          | 13   | Describe the methods of handling and summarizing the data that were charted.                                                                                                                    | 7                        |
| <b>RESULTS</b>                                |      |                                                                                                                                                                                                 |                          |
| Selection of sources of evidence              | 14   | Give numbers of sources of evidence screened, assessed for eligibility, and included in the review, with reasons for exclusions at each stage, ideally using a flow diagram.                    | Figure 1                 |
| Characteristics of sources of evidence        | 15   | For each source of evidence, present characteristics for which data were charted and provide the citations.                                                                                     | Pages 8 - 10 and Table 1 |
| Critical appraisal within sources of evidence | 16   | If done, present data on critical appraisal of included sources of evidence (see item 12).                                                                                                      | NA                       |
| Results of individual sources of evidence     | 17   | For each included source of evidence, present the relevant data that were charted that relate to the review questions and objectives.                                                           | Supplementary file II    |
| Synthesis of results                          | 18   | Summarize and/or present the charting results as they relate to the review questions and objectives.                                                                                            | 8 - 16                   |
| <b>DISCUSSION</b>                             |      |                                                                                                                                                                                                 |                          |
| Summary of evidence                           | 19   | Summarize the main results (including an overview of concepts, themes, and types of evidence available), link to the review questions and objectives, and consider the relevance to key groups. | 17                       |
| Limitations                                   | 20   | Discuss the limitations of the scoping review process.                                                                                                                                          | 19                       |
| Conclusions                                   | 21   | Provide a general interpretation of the results with respect to the review questions and objectives, as well as potential implications and/or next steps.                                       | 20                       |
| <b>FUNDING</b>                                |      |                                                                                                                                                                                                 |                          |
| Funding                                       | 22   | Describe sources of funding for the included sources of evidence, as well as sources of funding for the scoping review. Describe the role of the funders of the scoping review.                 | 20                       |

JBI = Joanna Briggs Institute; PRISMA-ScR = Preferred Reporting Items for Systematic reviews and Meta-Analyses extension for Scoping Reviews.

\* Where *sources of evidence* (see second footnote) are compiled from, such as bibliographic databases, social media platforms, and Web sites.

† A more inclusive/heterogeneous term used to account for the different types of evidence or data sources (e.g., quantitative and/or qualitative research, expert opinion, and policy documents) that may be eligible in a scoping review as opposed to only studies. This is not to be confused with *information sources* (see first footnote).

‡ The frameworks by Arksey and O'Malley (6) and Levac and colleagues (7) and the JBI guidance (4, 5) refer to the process of data extraction in a scoping review as data charting.

§ The process of systematically examining research evidence to assess its validity, results, and relevance before using it to inform a decision. This term is used for items 12 and 19 instead of "risk of bias" (which is more applicable to systematic reviews of interventions) to include and acknowledge the various sources of evidence that may be used in a scoping review (e.g., quantitative and/or qualitative research, expert opinion, and policy document).

From: Tricco AC, Lillie E, Zarin W, O'Brien KK, Colquhoun H, Levac D, et al. PRISMA Extension for Scoping Reviews (PRISMA-ScR): Checklist and Explanation. *Ann Intern Med.* 2018;169:467–473. doi: 10.7326/M18-0850.

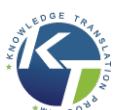

St. Michael's

Inspired Care.  
Inspiring Science.

For peer review only - <http://bmjopen.bmj.com/site/about/guidelines.xhtml>

# BMJ Open

## How value-based healthcare evolved: fifteen years of value-based healthcare research, a scoping review.

|                                 |                                                                                                                                                                                                                                                                                                                                                                                                                                                                                                                                                                                                                                                                                                                                                                                                                                                                                                                                                                                                                                                                                                                                                                                                                                      |
|---------------------------------|--------------------------------------------------------------------------------------------------------------------------------------------------------------------------------------------------------------------------------------------------------------------------------------------------------------------------------------------------------------------------------------------------------------------------------------------------------------------------------------------------------------------------------------------------------------------------------------------------------------------------------------------------------------------------------------------------------------------------------------------------------------------------------------------------------------------------------------------------------------------------------------------------------------------------------------------------------------------------------------------------------------------------------------------------------------------------------------------------------------------------------------------------------------------------------------------------------------------------------------|
| Journal:                        | <i>BMJ Open</i>                                                                                                                                                                                                                                                                                                                                                                                                                                                                                                                                                                                                                                                                                                                                                                                                                                                                                                                                                                                                                                                                                                                                                                                                                      |
| Manuscript ID                   | bmjopen-2022-064983.R1                                                                                                                                                                                                                                                                                                                                                                                                                                                                                                                                                                                                                                                                                                                                                                                                                                                                                                                                                                                                                                                                                                                                                                                                               |
| Article Type:                   | Original research                                                                                                                                                                                                                                                                                                                                                                                                                                                                                                                                                                                                                                                                                                                                                                                                                                                                                                                                                                                                                                                                                                                                                                                                                    |
| Date Submitted by the Author:   | 11-Jul-2022                                                                                                                                                                                                                                                                                                                                                                                                                                                                                                                                                                                                                                                                                                                                                                                                                                                                                                                                                                                                                                                                                                                                                                                                                          |
| Complete List of Authors:       | Vijverberg, Joanna; Maastricht University Medical Centre+, Department of Health Services Research; Sint Antonius Hospital, Department of Value-Based Healthcare<br>Daniels, Kirsten; Sint Antonius Hospital, Department of Value-Based Healthcare; Radboudumc Radboud Institute for Health Sciences, Scientific Center for Quality of Healthcare (IQ healthcare)<br>Steinmann, Gijs; Erasmus Universiteit Rotterdam Erasmus School of Health Policy and Management, Health Care Governance<br>Garvelink, Mirjam; Sint Antonius Hospital, Department of Value-Based Healthcare<br>Roupe van der Voort, Marc; Sint Antonius Hospital, Department of Juiste zorg, Juiste plaats, Juiste kosten<br>Biesma, Douwe; Leiden University Medical Center, Department of Internal Medicine<br>Bos, Willem Jan; Leiden University Medical Center, Department of Internal Medicine; Sint Antonius Hospital, Department of Internal Medicine<br>van Merode, Frits; Maastricht University Medical Centre+, Department of Health Services Research<br>van der Nat, Paul; Sint Antonius Hospital, Department of Value-Based Healthcare; Radboudumc Radboud Institute for Health Sciences, Scientific Center for Quality of Healthcare (IQ healthcare) |
| <b>Primary Subject Heading</b>: | Health services research                                                                                                                                                                                                                                                                                                                                                                                                                                                                                                                                                                                                                                                                                                                                                                                                                                                                                                                                                                                                                                                                                                                                                                                                             |
| Secondary Subject Heading:      | Health policy                                                                                                                                                                                                                                                                                                                                                                                                                                                                                                                                                                                                                                                                                                                                                                                                                                                                                                                                                                                                                                                                                                                                                                                                                        |
| Keywords:                       | Health policy < HEALTH SERVICES ADMINISTRATION & MANAGEMENT, Quality in health care < HEALTH SERVICES ADMINISTRATION & MANAGEMENT, HEALTH SERVICES ADMINISTRATION & MANAGEMENT                                                                                                                                                                                                                                                                                                                                                                                                                                                                                                                                                                                                                                                                                                                                                                                                                                                                                                                                                                                                                                                       |
|                                 |                                                                                                                                                                                                                                                                                                                                                                                                                                                                                                                                                                                                                                                                                                                                                                                                                                                                                                                                                                                                                                                                                                                                                                                                                                      |

SCHOLARONE™  
Manuscripts

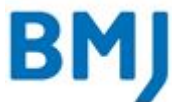

I, the Submitting Author has the right to grant and does grant on behalf of all authors of the Work (as defined in the below author licence), an exclusive licence and/or a non-exclusive licence for contributions from authors who are: i) UK Crown employees; ii) where BMJ has agreed a CC-BY licence shall apply, and/or iii) in accordance with the terms applicable for US Federal Government officers or employees acting as part of their official duties; on a worldwide, perpetual, irrevocable, royalty-free basis to BMJ Publishing Group Ltd ("BMJ") its licensees and where the relevant Journal is co-owned by BMJ to the co-owners of the Journal, to publish the Work in this journal and any other BMJ products and to exploit all rights, as set out in our [licence](#).

The Submitting Author accepts and understands that any supply made under these terms is made by BMJ to the Submitting Author unless you are acting as an employee on behalf of your employer or a postgraduate student of an affiliated institution which is paying any applicable article publishing charge ("APC") for Open Access articles. Where the Submitting Author wishes to make the Work available on an Open Access basis (and intends to pay the relevant APC), the terms of reuse of such Open Access shall be governed by a Creative Commons licence – details of these licences and which [Creative Commons](#) licence will apply to this Work are set out in our licence referred to above.

Other than as permitted in any relevant BMJ Author's Self Archiving Policies, I confirm this Work has not been accepted for publication elsewhere, is not being considered for publication elsewhere and does not duplicate material already published. I confirm all authors consent to publication of this Work and authorise the granting of this licence.



1  
2  
3 **How value-based healthcare evolved: fifteen years of value-based healthcare research, a**  
4 **scoping review.**  
5

6 Joanna R.G. Vijverberg<sup>1,2,\*</sup>, Kirsten Daniels<sup>2,3</sup>, Gijs Steinmann<sup>4</sup>, Mirjam M. Garvelink<sup>2</sup>, Marc B.V.  
7 Rouppe van der Voort<sup>5</sup>, Douwe H. Biesma<sup>6</sup>, Willem Jan W. Bos<sup>6, 7</sup>, Frits van Merode<sup>1</sup>, Paul B.  
8 van der Nat<sup>2,3</sup>  
9  
10  
11  
12  
13

14 <sup>1</sup> *Department of Health Services Research, Care and Public Health Research Institute (CAPHRI), Faculty of Health, Medicine*  
15 *and Life Sciences, Maastricht University Medical Centre+, Maastricht, The Netherlands*

16 <sup>2</sup> *Department of Value-Based Healthcare, St Antonius Hospital, Nieuwegein, the Netherlands*

17 <sup>3</sup> *Radboud Institute for Health Sciences, Scientific Center for Quality of Healthcare (IQ healthcare), Radboud University*  
18 *Medical Center, Nijmegen, the Netherlands*

19 <sup>4</sup> *Health Care Governance, Erasmus School of Health Policy & Management, Erasmus Universiteit, Rotterdam, Zuid-Holland,*  
20 *Netherlands*

21 <sup>5</sup> *Department of Juiste zorg, Juiste plaats, Juiste kosten, St Antonius Hospital, Nieuwegein, the Netherlands*

22 <sup>6</sup> *Department of Internal Medicine, Leiden University Medical Center, Leiden, the Netherlands*

23 <sup>7</sup> *Department of Internal Medicine, St Antonius Hospital, Nieuwegein, the Netherlands*

24 *\*Corresponding author: [a.vijverberg@antoniusziekenhuis.nl](mailto:a.vijverberg@antoniusziekenhuis.nl)*

25 *Department of Value-Based Healthcare, St Antonius Hospital, Postbus 2500, 3430 EM Nieuwegein, The Netherlands.*  
26  
27

## 28 **Keywords**

29 Value-based healthcare (VBHC); Integrated Practice Units; Outcome measurement; Bundled  
30 payments; Information Platforms; Implementation  
31  
32  
33

## 34 **Word count**

35 4142 words  
36  
37  
38  
39  
40  
41  
42  
43  
44  
45  
46  
47  
48  
49  
50  
51  
52  
53  
54  
55  
56  
57  
58  
59  
60

## Abstract

### *Objectives:*

We aimed to systematically map the extent, range and nature of research activity on value-based healthcare (VBHC), and to identify research gaps.

### *Design:*

A scoping review with an additional cited reference search was conducted, guided by the Joanna Briggs Institute (JBI) methodology.

### *Data Sources:*

The search was undertaken in PubMed, Embase and Web of Science.

### *Eligibility Criteria:*

Eligible articles mentioned VBHC or value with reference to the work of Porter or provided a definition of VBHC or value.

### *Data extraction and synthesis:*

Data was independently extracted using a data-extraction form. Two independent reviewers double extracted data from 10% of the articles. Data of the remaining articles (90%) was extracted by one reviewer and checked by a second. The strategic agenda of Porter and Lee was used to categorize the included articles.

### *Results:*

The searches yielded a total of 27.931 articles, of which 1.242 articles were analyzed. Most articles were published in North America. Most articles described an application of VBHC by measuring outcomes and costs (agenda item 2). The other agenda items were far less frequently described or implemented. Most of these articles were conceptual, meaning that nothing was actually changed or implemented.

### *Conclusion:*

The number of publications increased steadily after the introduction of VBHC in 2006. Almost one fifth of the articles could not be categorized in one of the items of the strategic agenda, which may lead to the conclusion that the current strategic agenda could be extended. In addition, a practical roadmap or guideline to implement VBHC is still lacking. Future research could fill this gap by specifically studying the effectiveness of VBHC in day-to-day clinical practice.

## Article Summary

### *Strengths and limitations of this study*

- The search method of this scoping review was comprehensive: it includes a large set of articles from a long period of time (2006-present) with all peer-reviewed study designs.
- This review shows the extent, range and nature of research activity on VBHC and identifies gaps in knowledge on VBHC for future research.
- With this scoping review, a database was created that can contribute to more in-depth systematic reviews to further explore what is known within each of the agenda items.
- Practical VBHC improvement initiatives might be underrepresented in this study because gray literature and non-peer-reviewed articles were not included.
- The included articles have not been assessed for quality because of the scoping nature of this review.

## Introduction

In 2006, value-based healthcare (VBHC) was introduced in the United States as a way to reform healthcare.[1] Rising costs, mounting quality issues and an increasing healthcare demand prompted the development of the VBHC concept by Michael E. Porter and Elizabeth Olmsted Teisberg.[1] According to them, improving value for the patient should be the overarching goal in healthcare. In healthcare, there are different approaches of defining and measuring value. In VBHC, value is defined as the health outcomes achieved per dollar spent.[1] To improve patient value, healthcare delivery should be organized around medical conditions over the full cycle of care. Universal measurement of value (outcomes and costs) is an important element in monitoring improvement.[2]

### *Strategic Agenda for value transformation*

In 2013, a strategic agenda was published, consisting of six agenda items for implementing a high-value healthcare delivery system (Box 1).[3] The agenda items were intended to support healthcare providers in the transition from a focus on volume, i.e. being organized around functionally organized departments and specialties, to a focus on value, i.e. being organized around what matters to patients with a specific medical condition.

#### **Box 1: the six agenda items of the strategic agenda.[3]**

|   |                                                                                        |
|---|----------------------------------------------------------------------------------------|
| 1 | Organize into integrated practice units (IPUs) around the patient's medical condition. |
| 2 | Measure outcomes and costs for every patient.                                          |
| 3 | Move to bundled payments for care cycles.                                              |
| 4 | Integrate care delivery across separate facilities.                                    |
| 5 | Expand excellent services across geography.                                            |
| 6 | Build an enabling information technology platform.                                     |

### *Implementation of VBHC*

The implementation of VBHC requires a major transition at both the level of healthcare providers, as well as at the level of (national) healthcare systems. Healthcare providers, such as hospitals, are typically (vertically) organized around functional departments and specialties. Transitioning towards an organization that is based on medical condition (horizontal) (agenda item 1) requires a fundamental reorganization of hospitals and their collaborating care-chain partners (agenda item 4). Measuring outcomes over the full cycle of care for a certain medical

1  
2  
3 condition (agenda item 2) also requires further major change. When VBHC was introduced in  
4  
5 2006, healthcare quality systems were aimed at monitoring providers' compliance to  
6  
7 (international) quality guidelines and norms. At the time, quality indicators were primarily  
8  
9 focused on process optimization and safety. Health outcomes were hardly available and not  
10  
11 measured at the level of medical conditions. Moreover, costs should be measured over the  
12  
13 full cycle of care taking the true costs of care delivery into account. This requires a different  
14  
15 approach for most healthcare providers (agenda item 2). The reimbursement of healthcare  
16  
17 providers should move to payment for value, which not only requires major changes for  
18  
19 healthcare providers, but also for health insurance companies and healthcare industry, such  
20  
21 as pharmaceutical companies (agenda item 3). The expansion of excellent care across  
22  
23 geography (agenda item 5) is challenging, because it arises from the progress on the other  
24  
25 agenda items. Finally, building an enabling IT-platform (agenda item 6) is essential for the  
26  
27 value transition. The availability of high-quality data and IT-infrastructure is named one of the  
28  
29 main cornerstones to move forward with VBHC.[4]

### 30 31 *The maturity of VBHC*

32 Value-based healthcare has become a popular vision for healthcare organizations. Since the  
33  
34 introduction of VBHC in the United States, the concept has spread around the world, and an  
35  
36 increasing number of healthcare providers are adopting VBHC principles in order to  
37  
38 continuously improve care. The article "What is value in health care?"[5] has since been cited  
39  
40 over 4500 times.[6] However, few details have been published on how to practically  
41  
42 implement VBHC. The strategic agenda proposed the major themes that need to be addressed  
43  
44 in healthcare, but how to actually implement these items is hardly described. VBHC has been  
45  
46 introduced as a strong vision for healthcare, but a practical guideline or scientific proof for the  
47  
48 success of the proposed strategic agenda is lacking. As a result, various aspects of VBHC are  
49  
50 only superficially understood and interpreted in different ways.[7] Scientific output on VBHC  
51  
52 is important since the healthcare sector, perhaps more than in economics or management,  
53  
54 uses an evidence-based paradigm. Healthcare professionals are used to consider the scientific  
55  
56 evidence before implementing an organizational reform such as VBHC.

57  
58 In order to support organizations in the implementation of VBHC, it is important to understand  
59  
60 how the VBHC concept and strategic agenda have been used in different contexts and have

1  
2  
3 evolved over time. Therefore, the aim of this scoping review was to systematically map the  
4 extent, range and nature of research activity on VBHC over the last fifteen years, and to  
5 identify potential research gaps. As this is a scoping review, the quality of the included articles  
6 was not assessed.  
7  
8  
9

## 10 11 12 **Methods**

13  
14 This scoping review was guided by the Joanna Briggs Institute (JBI) methodology for  
15 conducting scoping reviews,[8] to answer the main research question: “What are the extent,  
16 range and nature of research activities on VBHC over the last fifteen years, and what are the  
17 research gaps?”  
18  
19  
20  
21  
22

### 23 *Patient and Public Involvement*

24 Patients and the public were not involved in this study’s design, conduct or dissemination  
25 plans.  
26  
27  
28  
29

### 30 *Eligibility criteria*

31 The first eligibility criterium was that the article had to discuss or refer to VBHC. This criterium  
32 was met if the article 1) mentioned VBHC or value with reference to the work of Porter[1, 3,  
33 5, 9-11], or 2) provided a definition of VBHC or value in line with Porter’s definition. The  
34 purpose of these criteria was to be inclusive towards all interpretations of VBHC. If VBHC or  
35 value was only mentioned as a suggestion for further research, the article was not included.  
36  
37 The second criterium was that the context of the article had to be healthcare related. No  
38 restrictions were made with regard to the type of participants, type of study design or the  
39 outcomes measured. Only peer-reviewed articles were included.  
40  
41  
42  
43  
44  
45  
46  
47  
48

### 49 *Information sources and search strategy*

50 The three-step search strategy from the Joanna Briggs Institute was used.[8] First, an initial  
51 limited search was performed in PubMed. The title, abstract and index terms of the retrieved  
52 articles were analyzed to provide keywords for the final search. Second, the final search was  
53 carried out using the identified keywords from step 1. This search was undertaken in PubMed,  
54 Embase and Web of Science (Supplementary File 1). Third, the reference lists of all the  
55 retrieved articles were examined for additional articles. Additionally, a cited reference search  
56  
57  
58  
59  
60

1  
2  
3 for the article “What is value in health care?” was conducted.[5] In perspective with Porter's  
4 other references on VBHC, this is his most cited article.  
5

6  
7 Only articles published in English were included. The search was limited to publications  
8 between 1 January 2006 and 7 June 2021 (the day of the search), because of the introduction  
9 of VBHC in 2006.[1]  
10  
11

#### 12 13 14 *Selection process*

15 All search results were uploaded to EndNote. Duplicates were removed before screening.  
16 Titles, abstracts and full texts were independently assessed for eligibility by pairs of reviewers  
17 (JV, KD, GS, PN, MG). Reviewers did not screen articles they had written themselves.  
18 Discrepancies between reviewers were resolved in consensus meetings. If necessary, a third  
19 reviewer made the final decision. For the selection process, the application Rayyan was  
20 used.[12]  
21  
22  
23  
24  
25  
26  
27

#### 28 29 *Data extraction*

30 Data were independently extracted using a data-extraction form in REDCap (Research  
31 Electronic Data Capture) which was specifically developed and pilot tested for this review.[13,  
32 14] Extraction questions were aimed at the article’s main characteristics, references to VBHC,  
33 design, measured outcomes and the implemented elements of the strategic agenda. For each  
34 article, the reviewers (JV, KD, GS, PN, MG) indicated which items of the strategic agenda were  
35 reported, and had the possibility to write down potential new agenda items.  
36  
37  
38  
39  
40

41 Data from 10% of the articles (at random) was double extracted by two independent  
42 reviewers. Discrepancies in the extracted data were discussed and resolved by a set of  
43 reviewers. Thereafter, data extraction of the remaining 90% was performed by one reviewer  
44 (JV, KD, GS, MG) and checked by a second.  
45  
46  
47  
48  
49

#### 50 51 *Analysis and presentation of results*

52 The PRISMA flowchart was used to summarize the review decision process.[15] The extracted  
53 data were summarized quantitatively. The categorical data were expressed as frequencies.  
54 The statistical analysis was performed with use of Mathematica software (Wolfram Research,  
55 Inc., Mathematica, Version 12.1.1, Champaign, IL (2021)).  
56  
57  
58  
59  
60

## Results

### *Selection*

The search yielded a total of 27.931 records, of which 2.218 records were found by the cited reference search (Figure 1). After duplicate removal, 12.909 potentially relevant articles remained. Title and abstract screening resulted in 8.078 articles to be excluded. Ten articles were excluded because no full text was available. The remaining 4.821 articles were assessed for eligibility in a full text screening, of which 74 articles were excluded because they were not peer-reviewed and 3.501 articles were excluded because they did not discuss or refer to VBHC. In total, 1.246 articles were included in this review. Four of these articles were not included in the analysis because they were written by Porter and described elements of the VBHC theory (source reports). Finally, 1.242 articles were analyzed.[2, 10, 11, 16] The full dataset with included articles and collected outcomes can be found in Supplemental File 2.

### *Review findings*

#### General

From 2006 to 2011 fewer than 10 articles were published per year (Figure 2). The number of articles increased yearly, with the exception of 2018. North American centers published 72% (n=894) of the articles and published all the included articles up to the year 2009. In Europe, the first articles on VBHC were published in 2009. South America, Oceania, Asia and Africa together published 5% of the included articles (n=70). The location of the articles was based on the affiliation of the first author.

Most articles were original articles (n=627, 50%), followed by narrative reviews, perspectives, opinion papers, and short report (n=506, 41%). Six percent of the articles were systematic or scoping literature reviews (n=69). Case studies accounted for 3% of the included articles (n=36) and methodologies for less than 1% (n=4) (Table 1).

Most of the original articles had an observational study design (n=561, 89%); 7% of the articles had an experimental design (n=42). In 76% of the original articles quantitative research methods were used (n=474). A small part of the articles used a qualitative method (n=72, 11%). Of the 561 observational articles, the majority collected the data retrospectively (n=337, 60%).



The effect measures or endpoints in the original articles were clinical outcomes (n=359, 57%), costs (n=291, 46%), patient reported outcome measures (PROMs) (n=125, 20%), patient reported experience measures (PREMs) (n=31, 5%), no outcomes (n=73, 12%), or were indicated not applicable (NA) (n=47, 8%). Four articles measured all the above effect measures (clinical outcomes, costs, PROMs and PREMs). Twenty-four percent of the articles that measured PROMs measured generic PROMs (n=30), 33% measured condition-specific PROMs (n=41) and 31% measured both (n=39). In 12% of the articles that measured PROMs (n=15), it was unknown which PROMs were used.

When comparing the two continents that published the most articles (North America and Europe), a difference in measured endpoints was noted. In North America, the emphasis was on measuring clinical outcomes and costs (resp. n=274, 62% and n=243, 55%). While in Europe, the emphasis was on measuring clinical outcomes and PROMs (resp. n=67, 47% and n=46, 32%). Costs were measured less frequently as endpoint in Europe (n=35, 24%).

Most original articles reported on patients (n=463, 74%), some on healthcare professionals (n=116, 19%) (Table 2).

### Medical context

More than 50% of the articles reported on hospital care (Table 1). The most often studied medical specialty was orthopedic surgery (n=182, 15%) (Table 3).

**Table 1: Characteristics of included articles.**

| Characteristics                                                                                   | N (%)    |
|---------------------------------------------------------------------------------------------------|----------|
| <b>Type of article</b>                                                                            |          |
| Original article                                                                                  | 627 (50) |
| Short report / Brief communications / Perspective / Commentary / Opinion paper / Narrative review | 506 (41) |
| Literature review (scoping or systematic)                                                         | 69 (6)   |
| Case study                                                                                        | 36 (3)   |
| Methodology                                                                                       | 4 (<1)   |
| <b>Study design</b>                                                                               |          |
| Observational design                                                                              | 561 (89) |
| Experimental design                                                                               | 42 (7)   |
| Both designs                                                                                      | 4 (1)    |
| Unknown                                                                                           | 5 (1)    |
| Not applicable                                                                                    | 15 (2)   |

|                                         |          |
|-----------------------------------------|----------|
| <b>Research method</b>                  |          |
| Quantitative method                     | 474 (76) |
| Qualitative method                      | 72 (11)  |
| Both methods                            | 67 (11)  |
| Unknown                                 | 8 (1)    |
| Not applicable                          | 6 (1)    |
| <b>Data collection</b>                  |          |
| Retrospective                           | 337 (60) |
| Cross-sectional                         | 113 (20) |
| Prospective                             | 86 (15)  |
| Mix of retrospective and prospective    | 14 (3)   |
| Unknown                                 | 5(1)     |
| Not applicable                          | 6 (1)    |
| <b>Type of organization<sup>#</sup></b> |          |
| Hospital                                | 687 (55) |
| Public / Preventive care organization   | 27 (2)   |
| University                              | 12 (1)   |
| General practitioner                    | 11 (1)   |
| Pharmaceutical organization             | 8 (1)    |
| Health insurer                          | 3 (<1)   |
| Other*                                  | 56 (5)   |
| Unknown                                 | 77 (6)   |
| Not applicable                          | 378 (30) |

<sup>#</sup>Total is more than 100% because multiple answers could be selected. <sup>\*</sup>For example: ambulatory care organizations, databases, dental care organizations, companies, focus clinics, government, home care facilities, NGOs, primary healthcare, rehabilitation facilities.

**Table 2: Population of original articles.**

| <b>Study population (n=627)</b>                          |                          | <b>N (%)</b>                  |
|----------------------------------------------------------|--------------------------|-------------------------------|
| <b>Type of population<sup>#</sup></b>                    | Patients                 | 463 (74)                      |
|                                                          | Healthcare professionals | 116 (19)                      |
|                                                          | Other                    | 52 (8)                        |
|                                                          | Not applicable           | 52 (8)                        |
| <b>Median size of patient population</b>                 |                          | 565 (min: 3, max: 18.474.860) |
| <b>Median size of healthcare professional population</b> |                          | 40 (min: 3, max: 185.075)     |

<sup>#</sup>Total is more than 100% because multiple answers could be selected.

**Table 3: Medical specialties studied in the included articles.**

| <b>Medical specialty<sup>§</sup></b> | <b>N (%)</b> |
|--------------------------------------|--------------|
| Orthopedic surgery                   | 182 (15)     |
| Internal medicine <sup>^</sup>       | 178 (14)     |
| Surgery <sup>^</sup>                 | 111 (9)      |
| Radiology <sup>^</sup>               | 61 (5)       |
| Pediatrics <sup>^</sup>              | 50 (4)       |

|                                             |          |
|---------------------------------------------|----------|
| Anesthesiology                              | 38 (3)   |
| Urology                                     | 32 (3)   |
| Plastic surgery                             | 31 (2)   |
| Thoracic surgery                            | 31 (2)   |
| Otolaryngology                              | 29 (2)   |
| Obstetrics and gynecology                   | 26 (2)   |
| Neurological surgery                        | 22 (2)   |
| Colon and rectal surgery                    | 20 (2)   |
| Neurology                                   | 20 (2)   |
| Physical medicine and rehabilitation        | 20 (2)   |
| Neurological surgery and orthopedic surgery | 18 (1)   |
| Psychiatry                                  | 16 (1)   |
| Ophthalmology                               | 12 (1)   |
| Emergency medicine                          | 10 (1)   |
| Dermatology                                 | 9 (1)    |
| Family medicine                             | 4 (<1)   |
| Allergy and immunology                      | 2 (<1)   |
| Pathology                                   | 2 (<1)   |
| NA                                          | 248 (20) |
| Multiple                                    | 18 (1)   |
| Other^                                      | 52 (4)   |

*§List of specialties according to the American Board of Medical Specialties.[17] ^Subspecialties are displayed in Supplementary File 3.*

### Value-based healthcare

All included articles were rated for their extent to which VBHC played a role in the article. From highest to lowest VBHC rating, the categories were: 1. describing or implementing multiple agenda items and/or using the whole VBHC theory (n=171, 14%); 2. describing or implementing one of the agenda items (n=395, 32%); 3. discussing or using value in the article with Porter's definition, but not discussing or implementing any agenda items (n=373, 30%); 4. mentioning VBHC only as a motivation or context in the article (n=290, 23%) (Table 4). Furthermore, the type of article was registered. Most articles were either conceptual or with an application. Conceptual articles are solely descriptive, whereas articles with an application researched a topic in daily practice. Only 11% of the included articles were development studies, meaning that an innovation or initiative was developed but not implemented.

Most of the articles (n=953, 77%) referred to Porter's article "What is value in health care"[5] (Supplementary File 4). Articles that contained multiple sections (n=735) mostly referred to a paper of Porter in the introduction section (n=564, 77%), or the discussion section (n=233, 32%) (Supplementary File 4).

**Table 4: Overview of each article's relation to VBHC.**

| Extent to which VBHC played a role in the article (as rated by extractors) | N (%)    |
|----------------------------------------------------------------------------|----------|
| 1. Describe or implement multiple agenda items (highest rating)            | 171 (14) |
| 2. Describe or implement a specific part of VBHC or the strategic agenda   | 395 (32) |
| 3. Discuss how to improve value or measure value, with value defined       | 373 (30) |
| 4. VBHC is context or motivation for the study (lowest rating)             | 290 (23) |
| Other <sup>^</sup>                                                         | 13 (1)   |
| Type of article <sup>#</sup>                                               | N (%)    |
| Conceptual article                                                         | 528 (43) |
| Article with a development                                                 | 138 (11) |
| Article with an application <sup>&amp;</sup>                               | 579 (47) |

<sup>^</sup>For example: discussed VBHC as one of the possible approaches or description of a new interpretation of VBHC.

<sup>#</sup>Total was more than 100% because multiple answers could be selected. <sup>\$</sup> 58% (n=721) of the articles had one Porter reference, 36% of the articles had two or more references (mean: 2.6, range: 2-6). <sup>&</sup>For example: research into an implementation or retrospective research into two different patient groups.

### Implementation in general

In 288 articles (23%), the effect of an implementation was measured. The definition of an implementation article was that the article described a new process or technique implemented in daily work and presented the results. Two hundred seven of these articles (79%) reported that the implementation was a success. Implementation initiatives were considered successful if the authors indicated in the discussion and/or conclusion section that the implementation had led to improvement. Forty-five articles (16%) had no statements regarding the effectiveness of implementation and 16 articles (5%) reported that the implementation was not a success.

### Items of the strategic agenda

The most frequently found agenda item was measuring outcomes and/or costs (n=941, 76%). All other agenda items were found in less than 10% of the articles (Table 5). Five articles discussed or implemented all the agenda items.

For 228 articles, no agenda item could be selected. The six most mentioned 'new' agenda items were 'other type of contracting' (n=29), 'quality improvement' (n=23), 'VBHC culture' (n=11), 'education' (n=10), 'shared decision making' (n=8) and 'care delivery value chain' (n=5). Table 6 shows the number of agenda items selected per article. For most articles only one agenda item was selected (n=868, 70%). All the agenda items are discussed separately in the next sections.

**Table 5: Reported agenda items.**

| Agenda item #                                                                             | N (%)    |
|-------------------------------------------------------------------------------------------|----------|
| 1. Organize into integrated practice units (IPUs) around the patient's medical condition. | 71 (6)   |
| 2. Measure outcomes and costs for every patient.                                          | 941 (76) |
| 3. Move to bundled payments for care cycles.                                              | 84 (7)   |
| 4. Integrate care delivery across separate facilities.                                    | 22 (2)   |
| 5. Expand excellent services across geography.                                            | 13 (1)   |
| 6. Build an enabling information technology platform.                                     | 83 (7)   |
| No item selected                                                                          | 228 (18) |

#Total is more than 100% because multiple answers could be selected.

**Table 6: Number of agenda items selected per article.**

| Number of selected agenda items | N (%)    |
|---------------------------------|----------|
| 0                               | 228 (18) |
| 1                               | 868 (70) |
| 2                               | 115 (9)  |
| 3                               | 19 (2)   |
| 4                               | 6 (<1)   |
| 5                               | 1 (<1)   |
| 6                               | 5 (<1)   |

### Agenda item 1: Organizing into integrated practice units

Although 71 articles discussed an integrated practice unit (IPU), only three of them reported on the actual implementation of an IPU (4%). In most articles, the IPU was focused on one medical condition (n=32, 45%) and involved a multidisciplinary team (n=43, 61%) (Table 7).

Most of the articles that discussed an IPU were conceptual (n=41, 58%). Thirty-four percent (n=24) of the articles that discussed an IPU implemented some sort of a (medical) intervention or did a comparative study. Two articles (n=2, 3%) described the development of an IPU. Four articles combined these three phases.

### Agenda item 2: Measuring outcomes and costs

Of 941 articles reporting on outcomes and costs, most articles compared outcomes between treatments or interventions (n=155, 16%). A quarter of the articles did not compare outcomes (n=238, 25%). Of the 554 original articles in this category, 30% (n=168) reported solely on outcomes (clinical, PROMs or PREMs), 16% (n=87) reported solely on costs and 36% (n=201)

1  
2  
3 reported on both outcomes and costs. Eighteen percent (n=98) reported on other type of end  
4 points.  
5

6  
7 Different types of costs were measured. Direct costs were reported in 274 articles  
8 (29%); 40 articles reported direct and indirect costs (4%). Sixty-six articles measured the costs  
9 along the entire chain (20%). No distinction was made between whether the entire care chain  
10 was located inside or outside the hospital. Sixty-three articles (7%) developed a standard  
11 outcome set and thirteen articles (1%) a PROM (Table 7).  
12  
13  
14

15  
16 Half of the articles that discussed outcomes and costs reported an application (n=486,  
17 52%), a third of the articles were conceptual (n=308, 33%) and 10% reported on a  
18 development (n=95, 10%). Fifty-two articles reported on a combination of the three categories  
19 (n=52, 5%).  
20  
21  
22

### 23 24 25 Agenda item 3: Moving to bundled payments

26  
27 There were 84 articles that discussed a form of bundled payments (Table 7). Most of the  
28 articles were conceptual (n=55, 65%), followed by articles with an application (n=26, 31%) and  
29 articles with a development (n=2, 2%). One article described a combination of the three  
30 categories.  
31  
32  
33

34 Besides bundled payments, 'other forms of contracting' were frequently discussed. For  
35 example, pay for performance bonuses was discussed in 48 of all included articles (4%) and  
36 population-based payments in 8 articles (1%).  
37  
38  
39

### 40 41 42 Agenda item 4: Integrating across separate facilities

43  
44 Of the 22 articles in this category, eleven articles reported on a collaboration between  
45 healthcare providers or hospitals (50%). One article described the collaboration between a  
46 healthcare provider and an insurance company (5%). Another article discussed the  
47 collaboration between a healthcare provider and a university (5%). For the other nine articles,  
48 the question was not applicable (41%).  
49  
50  
51

52  
53 Fifty percent of the articles were conceptual (n=11, 50%), followed by articles with an  
54 application (n=8, 36%) and articles with a development (n=2, 9%). One article was a  
55 combination of the three categories (n=1, 5%).  
56  
57  
58

### 59 60 Agenda item 5: Expanding across geography

Thirteen articles reported on a spread of best practices across geography. Six of these articles reported on a spread within the country (national) (n=6, 46%). Seven articles reported on a spread across geography (n=7, 54%), but it remained unknown in which way. There were no articles that reported on a spread of best practices between countries (international).

Most of the articles were conceptual (n=7, 54%), followed by articles with an application (n=4, 31%) and one article reported on a development (n=1, 8%). One article was a combination of the three categories (n=1, 8%).

#### Agenda item 6: Building an information platform

A total of 83 articles reported on information platforms. A majority of the platform users were healthcare providers (n=47, 57%), followed by patients (n=25, 30%). Ten percent of the articles reported the use of real-time outcome information (n=8, 10%) (Table 7). Thirteen articles reported on telemedicine (16%), ten on e-health (12%) and eight on telehealth (10%). Telemedicine was defined as the provision of medical care with the use of communication technologies to connect healthcare providers and patients who are in different locations.[18] e-Health are the applications in which internet technology is used to offer information, products and/or services in healthcare.[18] Telehealth includes patient education, public health and in-service training for healthcare professionals.[18]

Most of the articles were conceptual (n=50, 60%), followed by articles with an application (n=23, 28%) and articles with a development (n=5, 6%). Five articles were a combination of the three categories (n=5, 6%).

**Table 7: In-depth information regarding the strategic agenda items.**

| <b>Agenda item 1: Organizing into integrated practice units (IPUs) (n=71)</b> |                                    | <b>N (%)</b> |
|-------------------------------------------------------------------------------|------------------------------------|--------------|
| <b>Phase of IPU#</b>                                                          | Design                             | 15 (21)      |
|                                                                               | Implementation                     | 3 (4)        |
|                                                                               | Evaluation of implementation       | 25 (35)      |
|                                                                               | Other                              | 7 (10)       |
|                                                                               | Not applicable                     | 23 (32)      |
| <b>Scale in organization</b>                                                  | In the whole organization          | 3 (4)        |
|                                                                               | Around one disease                 | 32 (45)      |
|                                                                               | Other                              | 7 (10)       |
|                                                                               | Not applicable                     | 26 (37)      |
|                                                                               | Unknown                            | 3 (4)        |
| <b>Team</b>                                                                   | Yes, the team is multidisciplinary | 43 (61)      |

|                                                               |                                           |              |
|---------------------------------------------------------------|-------------------------------------------|--------------|
|                                                               | No, the team has one discipline/specialty | 1 (1)        |
|                                                               | Not applicable                            | 19 (27)      |
|                                                               | Unknown                                   | 8 (11)       |
| <b>Agenda item 2: Measuring outcomes/costs (n=941)</b>        |                                           | <b>N (%)</b> |
| <b>Outcome set developed</b>                                  | Yes                                       | 63 (7)       |
| <b>PROM developed</b>                                         | Yes                                       | 13 (1)       |
| <b>Types of costs measured</b>                                | Direct costing *                          | 274 (29)     |
|                                                               | Indirect costing <sup>§</sup>             | 2 (<1)       |
|                                                               | Direct and indirect costing               | 40 (4)       |
|                                                               | Other                                     | 14 (1)       |
|                                                               | None / Not applicable                     | 596 (63)     |
|                                                               | Unknown                                   | 15 (2)       |
| <b>Entire chain</b>                                           | Yes                                       | 66 (20)      |
| <b>Agenda item 3: Moving to bundled payments (n=84)</b>       |                                           | <b>N (%)</b> |
| <b>Type of contracting<sup>#</sup></b>                        | Pay-for-performance bonuses               | 26 (31)      |
|                                                               | Bundled payments                          | 66 (79)      |
|                                                               | Population-based payments                 | 7 (8)        |
|                                                               | Other                                     | 17 (20)      |
| <b>Agenda item 6: Building an information platform (n=83)</b> |                                           | <b>N (%)</b> |
| <b>User of platform<sup>#</sup></b>                           | Healthcare professionals                  | 47 (57)      |
|                                                               | Patients                                  | 25 (30)      |
|                                                               | Management                                | 9 (11)       |
|                                                               | Administrative department                 | 7 (8)        |
|                                                               | Financial department                      | 4 (5)        |
|                                                               | Other                                     | 7 (8)        |
|                                                               | Not applicable                            | 24 (29)      |
|                                                               | Unknown                                   | 5 (6)        |
| <b>Real time</b>                                              | Yes                                       | 8 (10)       |
| <b>Telemedicine/telehealth/e-health<sup>#</sup></b>           | Telemedicine <sup>^</sup>                 | 13 (16)      |
|                                                               | E-health <sup>^</sup>                     | 10 (12)      |
|                                                               | Telehealth <sup>^</sup>                   | 8 (10)       |
|                                                               | Other                                     | 15 (18)      |
|                                                               | None                                      | 37 (45)      |
|                                                               | Unknown                                   | 2 (2)        |

<sup>#</sup>Total is more than 100% because multiple answers could be selected. \*The definition of direct costing used: "the costs associated with medical resource utilization, which include the consumption of in-patient, out-patient, and pharmaceutical services within the health care delivery system." [19] <sup>§</sup>The definition of indirect costing used: "the expenses incurred from the cessation or reduction of work productivity as a result of the morbidity and mortality associated with a given disease." [19] <sup>^</sup>Telemedicine: the provision of medical care with the use of communication technologies to connect healthcare providers and patients who are in different locations. [18] Telehealth: broader scope and includes patient education, public health and in-service training for healthcare professionals. [18] e-Health: applications in which internet technology is used to offer information, products and/or services in healthcare. [18]



## Discussion

### *Main findings*

This review showed that the extent, range and nature of VBHC research is large and still increasing; over the last fifteen years more than 1200 articles reported on VBHC. They described (the implementation of) the strategic agenda items within various specialties. The number of published articles increased each year, especially since 2013, with the exception of 2018. Most articles were published in the United States/North America, followed by Europe.

The majority of articles described the measurement of outcomes and costs. Other agenda items were far less frequently described or implemented. Most of the articles were conceptual, meaning that nothing was actually changed or implemented. When looking at the role that VBHC played in the articles, almost half of the articles discussed or implemented one or more agenda items; only five articles described or implemented all agenda items. Most articles were published from surgical specialties. Four main observations on these results are highlighted in the following paragraphs.

First, research on VBHC focused primarily on the agenda item “measuring outcomes and costs”. Furthermore, this agenda item had a relatively high ratio (52%) of application articles, meaning that outcomes and costs were actually measured. All other agenda items were reported on in a more conceptual way, without actually implementing or applying anything. The predominant focus on outcomes and costs might be explained by the formulation of the value definition, in which outcomes and costs are both specifically mentioned. Furthermore, it seems relatively difficult to implement other agenda items such as bundled payments of IPU without measuring outcomes and costs (value). The importance of measuring outcomes and costs has also been recognized in other quality of care concepts such as the Donabedian model.[20] Another explanation for the popularity of measuring outcomes and cost could be the clarity of this agenda item; this item is the least susceptible to interpretation differences. Additionally, Porter stated that measuring outcomes is the most important step and he dedicated a practical article on standard outcome sets,[5] which further facilitates the focus on measuring outcomes and costs. The types of outcomes and costs that were measured differed between continents. North America more often measured costs than Europe. Moreover, in the United States, VBHC was often used in the context of health care funding laws that place emphasis on curbing cost growth such as the Affordable Care Act (ACA). One of the goals of ACA was to expand healthcare coverage and to make healthcare

1  
2  
3 affordable to more citizens.[21] This focus on costs and payment methods might explain the  
4 higher number of articles measuring costs in North America.  
5

6  
7 Second, the current strategic agenda seemed to be incomplete. In 18% of the included  
8 articles, none of the current agenda items were discussed. Based on the issues that were  
9 addressed in these articles, we proposed four new agenda items: 'quality improvement',  
10 'VBHC culture', 'shared decision making', and 'education'. These four agenda items matched  
11 the new agenda items that were recently suggested.[22] It is important to note that some of  
12 the new agenda items, such as shared-decision making, were discussed in many of the  
13 included articles. However, in our methods, a new agenda item was only suggested by the  
14 reviewers when none of the current agenda items were checked in the data-extraction form.  
15 Thus, the number of articles with new agenda items were underreported.  
16  
17  
18  
19  
20  
21  
22

23 Third, there was a scarcity of articles on implementation of agenda items. Only a  
24 quarter of the included articles described an implementation. The majority of these articles  
25 focused on one agenda item. Few articles described implementation of multiple agenda items.  
26 The lack of implementation articles was in line with other research in hospital settings; Reitblat  
27 et al. concluded that the implementation and investigation of the strategic agenda in urology  
28 was limited[23] and another scoping review specifically focusing on VBHC implementation in  
29 hospital settings showed the same scarcity.[24] One reason for the lack of implementation  
30 articles might be the absence of a practical implementation guide for VBHC. The need for a  
31 road map that addresses the required steps for organizational changes has been  
32 acknowledged before.[10] Currently, this road map with practical steps is still missing and the  
33 available VBHC theory is interpreted in various ways.[25] This could lead to an inadequate  
34 implementation, as an ill-defined management intervention is often implemented in different  
35 ways.[26] Furthermore, it was argued that a low level of understanding might result in a  
36 dilution of the concept.[7] Therefore, it seems especially important to describe and observe  
37 different implementation initiatives around the world, to ultimately create a guideline for  
38 each healthcare contexts.  
39  
40  
41  
42  
43  
44  
45  
46  
47  
48  
49  
50  
51

52 Finally, it was striking that many of the included articles were focused on surgical  
53 specialties. A possible explanation is that these specialties have a longer history of quality  
54 registries (including outcome measures) and generally perform intervention-driven studies.  
55 Intervention-driven studies often compare health outcomes between interventions or patient  
56 groups. As a result, surgical articles focused more on health outcomes and linked this to the  
57  
58  
59  
60

1  
2  
3 VBHC concept and the definition of value; outcomes compared to costs. Another reason could  
4 be that VBHC principles are easier to implement in surgery as there is a more direct relation  
5 between intervention and outcomes.  
6  
7  
8  
9

### 10 *Strengths and limitations*

11 Some limitations need to be considered when interpreting the results of this study. First, the  
12 search strategy did not specifically include search terms for each agenda item, which could  
13 have resulted in selection bias. Second, using the article "What is value in health care?"[5] for  
14 the cited reference search, might have resulted in the overrepresentation of articles focusing  
15 on measuring value, outcomes or costs. Though, the representation of "What is value in health  
16 care" and other references to Porter found in our study is similar to the representation found  
17 in PubMed. Third, the focus of this study was on scientific peer-reviewed articles. As a result,  
18 VBHC implementation initiatives published in 'gray literature' or published as non-peer-  
19 reviewed articles, have not been included in this study. This might have led to an  
20 underrepresentation of the actual number of VBHC implementations in practice. Finally,  
21 inherent to the design of a scoping review, the included articles were not assessed for their  
22 research quality.  
23  
24  
25  
26  
27  
28  
29  
30  
31  
32  
33

34 A major strength of this review is its broad scope. The present study provides a  
35 comprehensive overview including items such as medical specialties, countries and all  
36 strategic agenda items (including potential new ones) (Supplementary File 2). In addition, the  
37 study's exclusion criteria deliberately generated a broad picture of the current state of  
38 research on VBHC. This has resulted in a complete picture of the current state of research on  
39 VBHC. The broad scope of this study was especially important in light of the different  
40 interpretations of the VBHC concept. Finally, to date, hardly any reviews on VBHC have been  
41 published, and existing reviews focusing on for example articles with an implementation of  
42 VBHC.[24]  
43  
44  
45  
46  
47  
48  
49  
50

### 51 *Implications for clinical practice and/or research*

52 With the exception of measuring outcomes and costs, few articles have implemented and  
53 researched the implementation of strategic agenda items. There is a need for studies that  
54 evaluate the implementation of the different strategic agenda items within different medical  
55 specialties. Insight in practical implementation is needed in order to work towards a roadmap  
56  
57  
58  
59  
60

1  
2  
3 for step-by-step implementation of VBHC. It is important to collect evidence from daily  
4 practice to serve the evidence-based paradigm of the healthcare sector. To contribute to more  
5 evidence, our database (Supplementary File 2) can be used for in-depth systematic reviews to  
6 further explore what is known within each of the agenda items.  
7  
8  
9

## 10 11 12 **Conclusion**

13  
14 This study showed that the number of publications steadily increased after the introduction  
15 of VBHC in 2006. The largest output came from North America, followed by Europe. There was  
16 a predominant focus on measuring outcomes and costs. In addition, almost one fifth of the  
17 articles could not be categorized in one of the items of the strategic agenda, which may lead  
18 to the conclusion that the current strategic agenda could be extended. Topics such as 'quality  
19 improvement', 'VBHC culture', 'shared decision making', and 'education' were proposed as  
20 potential new agenda items. Furthermore, there was a scarcity of articles with a practical  
21 implementation, leading to the conclusion that a practical roadmap or guideline to implement  
22 VBHC is still lacking. And last, many of the included articles were focused on surgical  
23 specialties. Future research could fill the gap by specifically researching the evidence on  
24 VBHC's effectiveness in day-to-day clinical practice.  
25  
26  
27  
28  
29  
30  
31  
32  
33  
34  
35  
36

## 37 **Acknowledgements**

38 First, we would like to thank Nienke van der Werf, information specialist at the Antonius  
39 Academy, for her help in setting up the search strategy for the three databases. In addition,  
40 we would like to thank Oscar van Staveren of the Antonius Academy for his help in finding the  
41 articles we wanted to screen full-text.  
42  
43  
44  
45  
46  
47

## 48 **Funding**

49 This research received no specific grant from any funding agency in the public, commercial  
50 or not-for-profit sectors.  
51  
52  
53  
54

## 55 **Competing interests**

56 None declared.  
57  
58  
59  
60

### **Author Contributions**

JV, KD, MG, MRV, DB, WB, FM and PN designed the review. JV and KD conducted the literature search. JV, KD, GS, MG and PN screened articles for inclusion and extracted data from the included articles. JV, KD and MG analyzed and interpreted the data. JV, KD, GS, MG and PN drafted the manuscript. All authors critically reviewed the manuscript. All authors approved the final version of the manuscript.

### **Patient consent**

None required.

### **Data sharing statement**

There is no additional unpublished data from this review.

### **Ethics Approval**

Ethics approval for this scoping review is not necessary under Dutch law (AVG) according to the Medical Research Involving Human Subjects act (WMO) because no human participants were involved.

## References

1. Porter ME, Teisberg EO. Redefining Health Care: Creating Value-based Competition on Results: Harvard Business Review Press 2006.
2. Porter ME. Value-based health care delivery. *Ann Surg* 2008;248(4):503-9. doi: 10.1097/SLA.0b013e31818a43af [published Online First: 2008/10/22]
3. Porter ME, Lee TH. The strategy that will fix health care. *Harvard Business Review* 2013;91(OCT):50-+.
4. Cossio-Gil Y, Omara M, Watson C, et al. The Roadmap for Implementing Value-Based Healthcare in European University Hospitals—Consensus Report and Recommendations. *Value in Health* 2021 doi: <https://doi.org/10.1016/j.jval.2021.11.1355>
5. Porter ME. What is value in health care? *N Engl J Med* 2010;363(26):2477-81. doi: 10.1056/NEJMp1011024 [published Online First: 2010/12/15]
6. *Google Scholar - Citations "What is value in health care?" - M.E. Porter.*
7. Fredriksson JJ, Ebbevi D, Savage C. Pseudo-understanding: an analysis of the dilution of value in healthcare. *BMJ Qual Saf* 2015;24(7):451-7. doi: 10.1136/bmjqs-2014-003803 [published Online First: 2015/05/16]
8. Peters M, Godfrey C, McInerney P, et al., *Chapter 11: Scoping Reviews*, in *JBI Manual for Evidence Synthesis*. 2020, JBI.
9. Kaplan RS, Porter ME. How to solve the cost crisis in health care. *Harv Bus Rev* 2011;89(9):46-52.
10. Porter ME. A strategy for health care reform--toward a value-based system. *N Engl J Med* 2009;361(2):109-12. doi: 10.1056/NEJMp0904131, 10.1056/NEJMp0904131. Epub 2009 Jun 3. [published Online First: 2009/06/06]
11. Porter ME, Larsson S, Lee TH. Standardizing Patient Outcomes Measurement. *N Engl J Med* 2016;374(6):504-6. doi: 10.1056/NEJMp1511701 [published Online First: 2016/02/11]
12. <http://rayyan.qcri.org>.
13. Harris PA, Taylor R, Minor BL, et al. The REDCap consortium: Building an international community of software platform partners. *J Biomed Inform* 2019;95:103208. doi: 10.1016/j.jbi.2019.103208 [published Online First: 2019/05/13]
14. Harris PA, Taylor R, Thielke R, et al. Research electronic data capture (REDCap)—a metadata-driven methodology and workflow process for providing translational research informatics support. *Journal of biomedical informatics* 2009;42(2):377-81.
15. Page MJ, Moher D, Bossuyt PM, et al. PRISMA 2020 explanation and elaboration: updated guidance and exemplars for reporting systematic reviews. *BMJ* 2021;372:n160. doi: 10.1136/bmj.n160 [published Online First: 2021/03/31]
16. Porter M, Teisberg E. How physicians can change the future of health care. *JAMA* 2007;1103-11.
17. <https://www.abms.org/member-boards/specialty-subspecialty-certificates/>.
18. Fatehi F, Wootton R. Telemedicine, telehealth or e-health? A bibliometric analysis of the trends in the use of these terms. *J Telemed Telecare* 2012;18(8):460-4. doi: 10.1258/jtt.2012.gth108 [published Online First: 2012/12/05]
19. Boccuzzi SJ, *Indirect health care costs*, in *Cardiovascular health care economics*. 2003, Springer. p. 63-79.
20. Donabedian A. Evaluating the quality of medical care. *Milbank Mem Fund Q* 1966;44(3):Suppl:166-206. [published Online First: 1966/07/01]

- 1
  - 2
  - 3
  - 4
  - 5
  - 6
  - 7
  - 8
  - 9
  - 10
  - 11
  - 12
  - 13
  - 14
  - 15
  - 16
  - 17
  - 18
  - 19
  - 20
  - 21
  - 22
  - 23
  - 24
  - 25
  - 26
  - 27
  - 28
  - 29
  - 30
  - 31
  - 32
  - 33
  - 34
  - 35
  - 36
  - 37
  - 38
  - 39
  - 40
  - 41
  - 42
  - 43
  - 44
  - 45
  - 46
  - 47
  - 48
  - 49
  - 50
  - 51
  - 52
  - 53
  - 54
  - 55
  - 56
  - 57
  - 58
  - 59
  - 60
21. <https://www.cms.gov/newsroom/fact-sheets/bundled-payments-care-improvement-initiative-bpci-fact-sheet>
22. van der Nat PB. The new strategic agenda for value transformation. Health Serv Manage Res 2021;9514848211011739. doi: 10.1177/09514848211011739 [published Online First: 2021/04/27]
23. Reitblat C, Bain PA, Porter ME, et al. Value-Based Healthcare in Urology: A Collaborative Review. European Urology 2021
24. van Staaldin DJ, van den Bekerom P, Groeneveld S, et al. The implementation of value-based healthcare: a scoping review. BMC health services research 2022;22(1):1-8.
25. Steinmann G, van de Bovenkamp H, de Bont A, et al. Redefining value: a discourse analysis on value-based health care. BMC Health Serv Res 2020;20(1):862. doi: 10.1186/s12913-020-05614-7 [published Online First: 2020/09/16]
26. Colldén C, Hellström A. Value-based healthcare translated: a complementary view of implementation. BMC health services research 2018;18(1):1-11.

1  
2  
3 **Figure legends**  
4

5 Figure 1: Flowchart with review decision process.  
6

7 Figure 2: Bar chart with number of publications over the years. NB: the search was  
8 conducted in June 2021.  
9  
10  
11  
12  
13  
14  
15  
16  
17  
18  
19  
20  
21  
22  
23  
24  
25  
26  
27  
28  
29  
30  
31  
32  
33  
34  
35  
36  
37  
38  
39  
40  
41  
42  
43  
44  
45  
46  
47  
48  
49  
50  
51  
52  
53  
54  
55  
56  
57  
58  
59  
60

For peer review only



## Identification of studies via databases and registers

### Identification

Records identified from:  
Databases  
(PubMed n=5.128  
Embase n=6.213  
Web of Science n=14.372  
Citation searching n=2.218)

Records removed before  
screening:  
Duplicate records removed  
(n=15.022)

### Screening

Records screened  
(n=12.909)

Records excluded  
(n=8.078)

Reports sought for retrieval  
(n=4.831)

Reports not retrieved  
(n=10)

Reports assessed for  
eligibility  
(n=4.821)

Reports excluded:  
Not on VBHC (n=3.501)  
Not a peer-reviewed article  
(n=74)

### Included

Studies included in review  
(n=1.246)

Reports excluded from  
analysis:  
Source reports (n=4)

Studies analysed in review  
(n=1.242)

1  
2  
3  
4  
5  
6  
7  
8  
9  
10  
11  
12  
13  
14  
15  
16  
17  
18  
19  
20  
21  
22  
23  
24  
25  
26  
27  
28  
29  
30  
31  
32  
33  
34  
35  
36  
37  
38  
39  
40  
41  
42  
43  
44  
45  
46

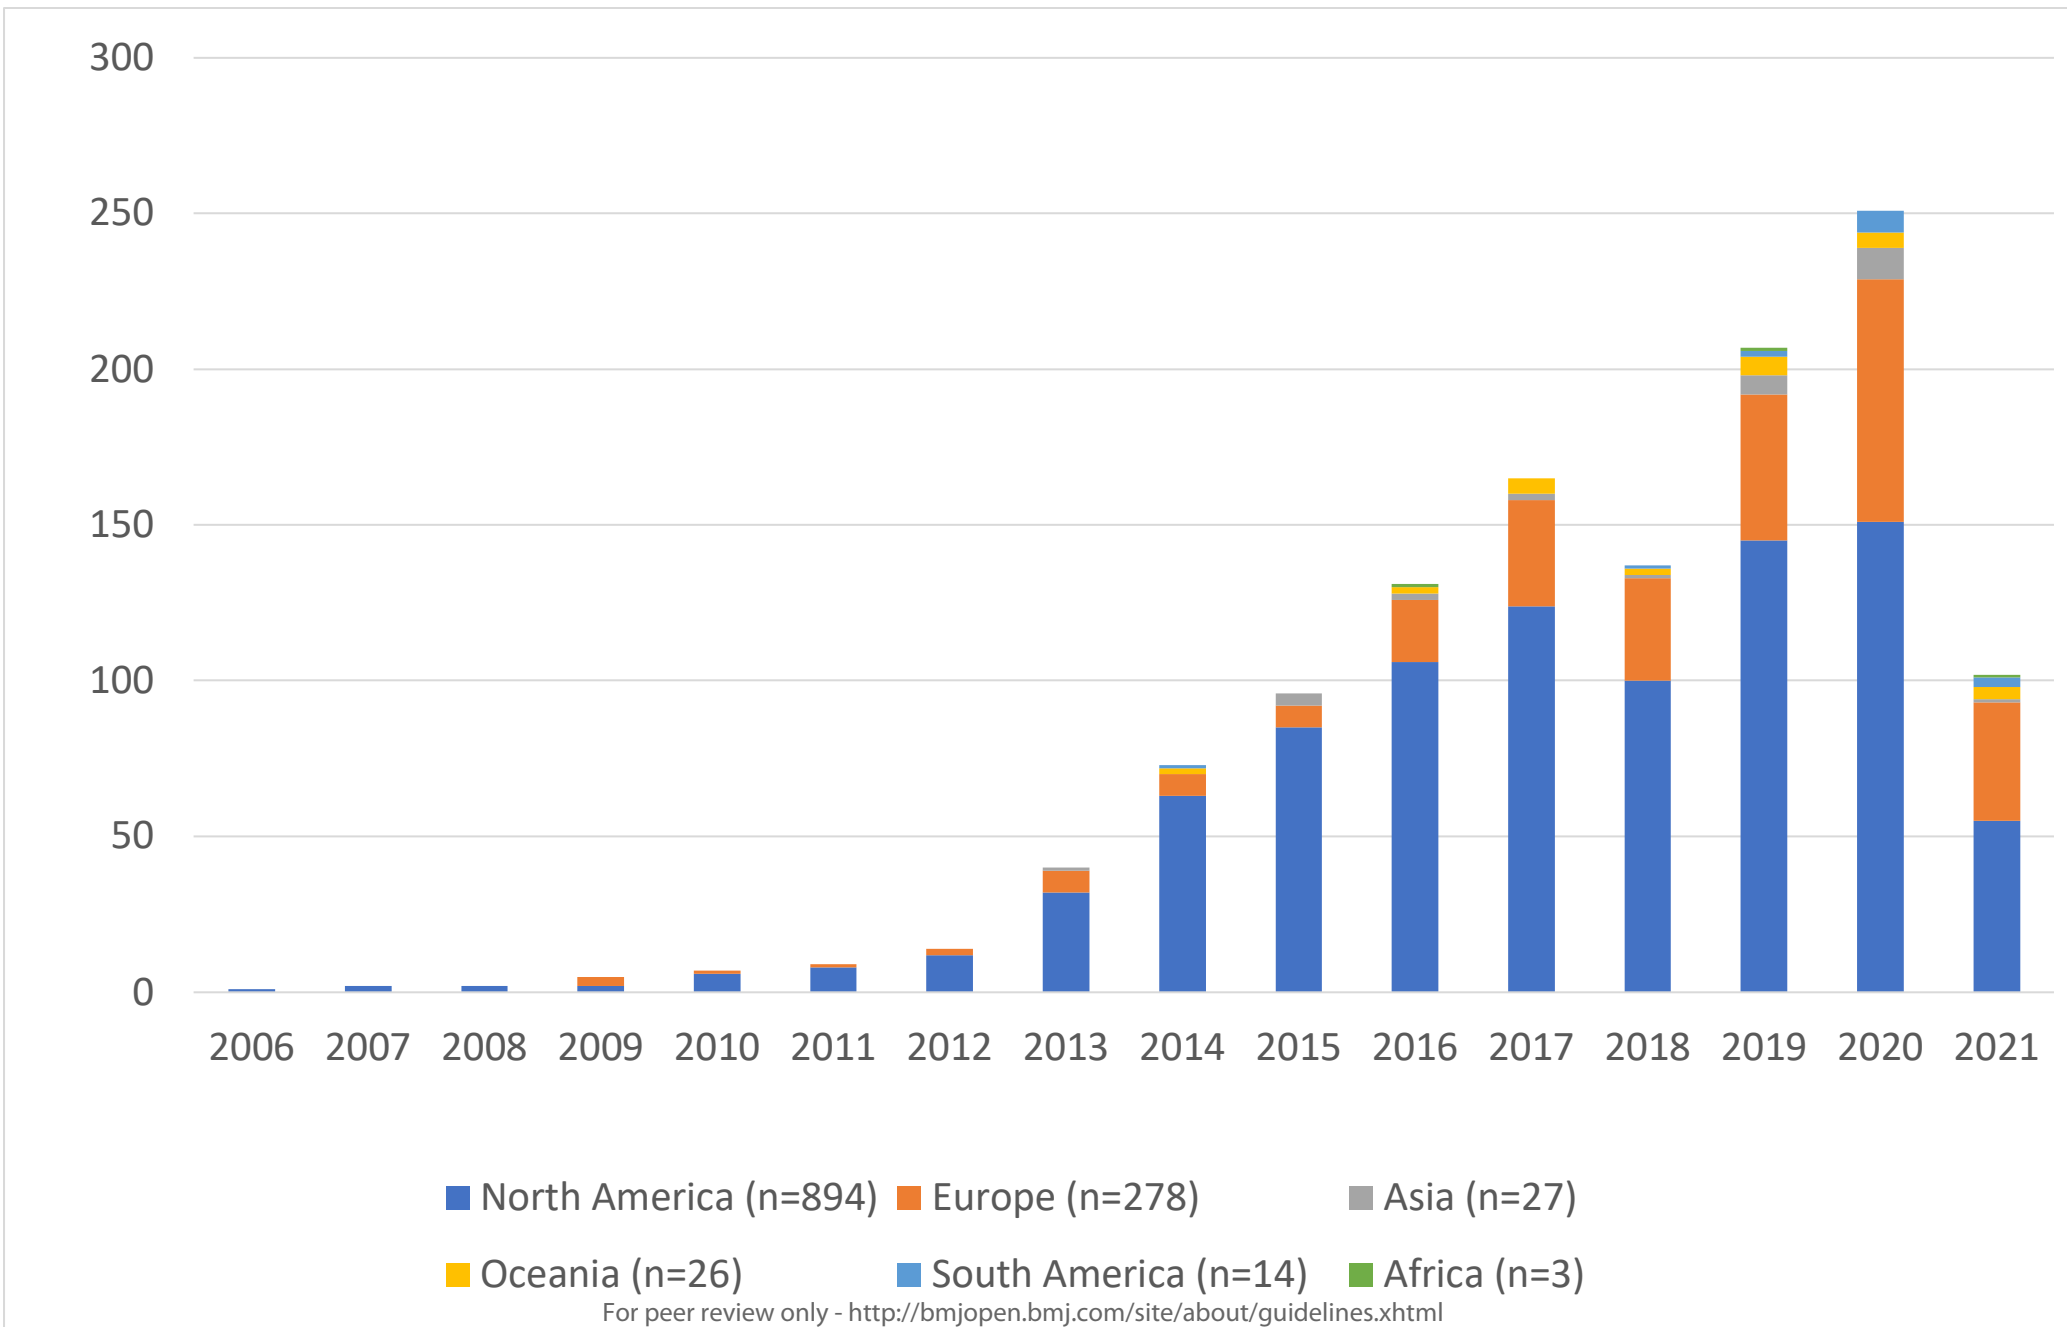

## Supplementary File 1

The electronic search strategy used for PubMed.

*("VBHC"[tiab] OR "value-added care"[tiab] OR "value added care"[tiab] OR "value-added healthcare"[tiab] OR "value added healthcare"[tiab]*

*OR*

*(("Delivery of Health Care"[Mesh] OR "Health Care"[tiab] OR "healthcare"[tiab] OR "care"[tiab] OR "Costs and Cost Analysis"[Mesh] OR "cost"[tiab] OR "costs"[tiab] OR "pricing"[tiab] OR "payment"[tiab] OR "payments"[tiab] OR "purchasing"[tiab] OR "expenditure"[tiab] OR "expenditures"[tiab] OR "economic"[tiab] OR "economics"[tiab] OR "insurance"[tiab] OR "Quality of Health Care"[Mesh] OR "outcome"[tiab] OR "outcomes"[tiab] OR "PROMS"[ti] OR "indicator"[tiab] OR "indicators"[tiab] OR "benchmark"[tiab] OR "benchmarking"[tiab] OR "best practice"[tiab] OR "best practices"[tiab] OR "Integrated Practice units"[tiab] OR "IPU"[ti] OR "lean"[tiab] OR "six sigma"[tiab] OR "six sigmas"[tiab] OR "management"[tiab] OR "organisation"[tiab] OR "organization"[tiab] OR "Contracts"[Mesh] OR "contracting"[tiab] OR "contract"[tiab] OR "contracts"[tiab])*

*AND*

*("value-based"[tiab] OR "value based"[tiab]))*

*AND*

*(("2006/01/01"[PDat]: "2030/12/31"[PDat]))*





Table with columns: Line Number, Author(s), Title, Journal, Year, Status, etc. The table contains a list of references, with each row corresponding to a specific citation. The references include authors' names, titles of their articles, the journals they were published in, and the year of publication. The status column indicates the current state of each reference, such as 'Included', 'Excluded', or 'Unpublished'.









| Variable                                                                                                          | Field label                                                          | Options                                                                                                                                                                                                                                                                                        |
|-------------------------------------------------------------------------------------------------------------------|----------------------------------------------------------------------|------------------------------------------------------------------------------------------------------------------------------------------------------------------------------------------------------------------------------------------------------------------------------------------------|
| <b>Country of origin of the article</b>                                                                           | What was the country of origin of the article?                       | <i>dropdown, Required</i>                                                                                                                                                                                                                                                                      |
| <b>Type of article</b>                                                                                            | What type of article was written?                                    | <i>radio, Required:</i><br>Original article<br>Literature review (scoping or systematic)<br>Short report / Brief communications / Perspective / Commentary / Opinion paper / Narrative review<br>Case study<br>Methodology<br>Other                                                            |
| <b>Population type researched</b><br>Show the field ONLY if:<br>[method]="1" AND [type_article]= original article | What population did the article research?                            | <i>checkbox, Required:</i><br>Patients<br>Healthcare professionals<br>Not applicable<br>Other                                                                                                                                                                                                  |
| <b>Research method</b><br>Show the field ONLY if:<br>[method]="1" AND [type_article]= original article            | Was the research method of the article qualitative or quantitative?  | <i>radio, Required:</i><br>Quantitative<br>Qualitative<br>Both<br>NA<br>Unknown                                                                                                                                                                                                                |
| <b>Type of outcome measured</b><br>Show the field ONLY if:<br>[method]="1" AND [type_article]= original article   | What type of outcomes were measured in the article?                  | <i>checkbox, Required:</i><br>Patient-reported outcome measures (PROMs) (including questionnaires on disease symptoms, functional ability, quality of life)<br>Clinician reported outcomes (clinical outcomes)<br>Patient-reported experience measures (PREMs)<br>Costs<br>None<br>Other<br>NA |
| <b>Type of PROMs</b><br>Show the field ONLY if:<br>[type_of_outcomes(1)] = PROMs                                  | Which PROMs were measured?                                           | <i>radio, Required:</i><br>Generic PROMs<br>Specific PROMs<br>Both<br>Other<br>Unknown<br>NA                                                                                                                                                                                                   |
| <b>Standard set used</b><br>Show the field ONLY if:<br>[method]="1" AND [type_article]= original article          | Was a standard set used to measure outcomes?                         | <i>radio, Required:</i><br>Yes, ICHOM<br>Yes, COMET<br>Other<br>No<br>Unknown<br>NA                                                                                                                                                                                                            |
| <b>Study design</b><br>Show the field ONLY if:<br>[method]="1" AND [type_article]= original article               | Was the design of the article observational or experimental?         | <i>radio, Required:</i><br>Observational<br>Experimental<br>Both<br>NA<br>Unknown                                                                                                                                                                                                              |
| <b>Data collection</b><br>Show the field ONLY if:<br>[study_design] = observational OR [study_design] = both      | Was the data collection of the article retrospective or prospective? | <i>radio, Required:</i><br>Retrospective<br>Prospective                                                                                                                                                                                                                                        |

|                                                                        |                                                                                                                                                    |                                                                                                                                                                                                                                                                                                                           |
|------------------------------------------------------------------------|----------------------------------------------------------------------------------------------------------------------------------------------------|---------------------------------------------------------------------------------------------------------------------------------------------------------------------------------------------------------------------------------------------------------------------------------------------------------------------------|
|                                                                        |                                                                                                                                                    | Both (Retro+pro)<br>NA<br>Unknown<br>Cross-sectional                                                                                                                                                                                                                                                                      |
| <b>Medical specialty</b>                                               | Which medical specialty was mainly researched in the article?                                                                                      | <i>text, Required</i>                                                                                                                                                                                                                                                                                                     |
| <b>Level of VBHC</b>                                                   | On what level did the article report on VBHC?                                                                                                      | <i>radio, Required:</i><br>1. Describe or implement multiple agenda items (highest extent)<br>2. Describe or implement a specific part of VBHC or the strategic agenda<br>3. Discuss how to improve value or measure value, with value defined<br>4. VBHC is context or motivation for the study (lowest extent)<br>Other |
| <b>Type of article 2 (concept/development/application)</b>             | Was it a conceptual article or an development article or an application article?                                                                   | <i>checkbox, Required:</i><br>Conceptual article<br>Development of application (not applicated, but developed)<br>Article with an application<br>Other<br>NA                                                                                                                                                              |
| <b>Agenda item = IPU</b>                                               | Section Header: <i>Were the agenda items researched?</i><br>Organize into integrated practice units (IPUs) around the patient's medical condition. | <i>radio (Matrix), Required:</i><br>Yes, researched<br>No, not researched<br>Unknown                                                                                                                                                                                                                                      |
| <b>Agenda item = Outcomes and Costs</b>                                | Measure outcomes and costs for every patient.                                                                                                      | <i>radio (Matrix), Required:</i><br>Yes, researched<br>No, not researched<br>Unknown                                                                                                                                                                                                                                      |
| <b>Agenda item = Bundled Payments</b>                                  | Move to bundled payments for care cycles.                                                                                                          | <i>radio (Matrix), Required:</i><br>Yes, researched<br>No, not researched<br>Unknown                                                                                                                                                                                                                                      |
| <b>Agenda item = Across Separate Facilities</b>                        | Integrate care delivery across separate facilities.                                                                                                | <i>radio (Matrix), Required:</i><br>Yes, researched<br>No, not researched<br>Unknown                                                                                                                                                                                                                                      |
| <b>Agenda item = Across Geography</b>                                  | Expand excellent services across geography.                                                                                                        | <i>radio (Matrix), Required:</i><br>Yes, researched<br>No, not researched<br>Unknown                                                                                                                                                                                                                                      |
| <b>Agenda item = Information Platform</b>                              | Build an enabling information technology platform.                                                                                                 | <i>radio (Matrix), Required:</i><br>Yes, researched<br>No, not researched<br>Unknown                                                                                                                                                                                                                                      |
| <b>Other type of contracting</b>                                       | Was other type of contracting researched?                                                                                                          | <i>radio (Matrix), Required:</i><br>Yes, researched<br>No, not researched<br>Unknown                                                                                                                                                                                                                                      |
| <b>Phase IPU</b><br>Show the field ONLY if:<br>[ipu] = Yes, researched | What was the phase of the IPU researched?                                                                                                          | <i>checkbox, Required:</i><br>Design<br>Implementation<br>Evaluation of implementation<br>Unknown<br>Other                                                                                                                                                                                                                |

|    |                                                |                                                             |                                           |
|----|------------------------------------------------|-------------------------------------------------------------|-------------------------------------------|
| 1  |                                                |                                                             | NA                                        |
| 2  | <b>Scale of IPU</b>                            | On which scale in the organization was the IPU implemented? | <i>radio, Required:</i>                   |
| 3  | Show the field ONLY if:                        |                                                             | In the whole organization                 |
| 4  | [ipu] = Yes, researched                        |                                                             | Around one disease                        |
| 5  |                                                |                                                             | Other                                     |
| 6  |                                                |                                                             | Unknown                                   |
| 7  |                                                |                                                             | NA                                        |
| 8  | <b>Multidisciplinary of team</b>               | Was the team in the IPU multidisciplinary?                  | <i>radio, Required:</i>                   |
| 9  | Show the field ONLY if:                        |                                                             | Yes, the team is multidisciplinary        |
| 10 | [ipu] = Yes, researched                        |                                                             | No, the team has one discipline/specialty |
| 11 |                                                |                                                             | Other                                     |
| 12 |                                                |                                                             | Unknown                                   |
| 13 |                                                |                                                             | NA                                        |
| 14 | <b>Outcome set or PROMs developed</b>          | Was an outcome set or PROMs developed?                      | <i>radio, Required:</i>                   |
| 15 | Show the field ONLY if:                        |                                                             | Yes, an outcome set                       |
| 16 | [outcomes_costs] = Yes, researched             |                                                             | Yes, PROMs                                |
| 17 |                                                |                                                             | No                                        |
| 18 |                                                |                                                             | Unknown                                   |
| 19 | <b>Type of costs</b>                           | What type of costs were measured?                           | <i>checkbox, Required:</i>                |
| 20 | Show the field ONLY if:                        |                                                             | Direct cost                               |
| 21 | [outcomes_costs] = Yes, researched             |                                                             | Indirect cost                             |
| 22 |                                                |                                                             | Other                                     |
| 23 |                                                |                                                             | None                                      |
| 24 |                                                |                                                             | Unknown                                   |
| 25 |                                                |                                                             | NA                                        |
| 26 | <b>Collaborating facility</b>                  | Which parties collaborated across the separate facilities?  | <i>checkbox, Required:</i>                |
| 27 | Show the field ONLY if:                        |                                                             | Healthcare provider / hospital            |
| 28 | [across_separate_facilities] = Yes, researched |                                                             | Insurance company                         |
| 29 |                                                |                                                             | University                                |
| 30 |                                                |                                                             | Research center                           |
| 31 |                                                |                                                             | Pharmaceutical company                    |
| 32 |                                                |                                                             | Other                                     |
| 33 |                                                |                                                             | Unknown                                   |
| 34 |                                                |                                                             | NA                                        |
| 35 | <b>Expand national or international</b>        | Did the organization expand national or international?      | <i>checkbox, Required:</i>                |
| 36 | Show the field ONLY if:                        |                                                             | National expansion                        |
| 37 | [across_geography] = Yes, researched           |                                                             | International expansion                   |
| 38 |                                                |                                                             | Unknown                                   |
| 39 | <b>User of IT platform</b>                     | Who was the user of the information platform?               | <i>checkbox, Required:</i>                |
| 40 | Show the field ONLY if:                        |                                                             | Patients                                  |
| 41 | [information_platform] = Yes, researched       |                                                             | Healthcare professionals                  |
| 42 |                                                |                                                             | Management                                |
| 43 |                                                |                                                             | Administrative department                 |
| 44 |                                                |                                                             | Financial department                      |
| 45 |                                                |                                                             | Other                                     |
| 46 |                                                |                                                             | NA                                        |
|    |                                                |                                                             | Unknown                                   |
|    | <b>Type of contracting</b>                     | What type of contracting was discussed/used?                | <i>checkbox, Required:</i>                |
|    | Show the field ONLY if:                        |                                                             | Pay-for-performance bonuses               |
|    | [other_type_of_contracting] = Yes, researched  |                                                             | Bundled payments                          |
|    | OR [bundled_payments] = Yes, researched        |                                                             | Population-based payments                 |

1  
2  
3  
4  
5  
6  
7  
8  
9  
10  
11  
12  
13  
14  
15  
16  
17  
18  
19  
20  
21  
22  
23  
24  
25  
26  
27  
28  
29  
30  
31  
32  
33  
34  
35  
36  
37  
38  
39  
40  
41  
42  
43  
44  
45  
46

|         |
|---------|
| Other   |
| Unknown |

For peer review only

## Supplementary File 3

| Medical specialty                           |                                         | N (%)    |
|---------------------------------------------|-----------------------------------------|----------|
| Allergy and immunology                      |                                         | 2 (<1)   |
| Anesthesiology                              |                                         | 38 (3)   |
| Colon and rectal surgery                    |                                         | 20 (2)   |
| Dermatology                                 |                                         | 9 (1)    |
| Emergency medicine                          |                                         | 10 (1)   |
| Family medicine                             |                                         | 4 (<1)   |
| Internal medicine                           |                                         |          |
|                                             | <i>Cardiology</i>                       | 35 (3)   |
|                                             | <i>Endocrinology</i>                    | 3 (<1)   |
|                                             | <i>Gastroenterology</i>                 | 33 (3)   |
|                                             | <i>Geriatric medicine</i>               | 9 (1)    |
|                                             | <i>Hematology</i>                       | 8 (1)    |
|                                             | <i>Infectious disease</i>               | 8 (1)    |
|                                             | <i>Internal medicine general</i>        | 14 (1)   |
|                                             | <i>Nephrology</i>                       | 8 (1)    |
|                                             | <i>Oncology</i>                         | 34 (3)   |
|                                             | <i>Pulmonary disease</i>                | 14 (1)   |
|                                             | <i>Rheumatology</i>                     | 10 (1)   |
|                                             | <i>Sleep medicine</i>                   | 2 (<1)   |
| Neurological surgery                        |                                         | 22 (2)   |
| Neurological surgery and orthopedic surgery |                                         | 18 (1)   |
| Neurology                                   |                                         | 20 (2)   |
| Obstetrics and gynecology                   |                                         | 26 (2)   |
| Ophthalmology                               |                                         | 12 (1)   |
| Orthopedic surgery                          |                                         | 182 (15) |
| Otolaryngology                              |                                         | 29 (2)   |
| Pathology                                   |                                         | 2 (<1)   |
| Pediatrics                                  |                                         |          |
|                                             | <i>Neonatal-perinatal medicine</i>      | 5 (<1)   |
|                                             | <i>Pediatric cardiology</i>             | 12 (1)   |
|                                             | <i>Pediatric critical care medicine</i> | 1 (<1)   |
|                                             | <i>Pediatric endocrinology</i>          | 1 (<1)   |
|                                             | <i>Pediatric gastroenterology</i>       | 1 (<1)   |
|                                             | <i>Pediatrics general</i>               | 22 (2)   |
|                                             | <i>Pediatric hematology-oncology</i>    | 1 (<1)   |
|                                             | <i>Pediatric infectious diseases</i>    | 5 (<1)   |
|                                             | <i>Pediatric pulmonology</i>            | 2 (<1)   |
| Physical medicine and rehabilitation        |                                         | 20 (2)   |
| Plastic surgery                             |                                         | 31 (2)   |
| Psychiatry                                  |                                         | 16 (1)   |
| Radiology                                   |                                         |          |
|                                             | Diagnostic radiology                    | 37 (3)   |

|                  |                                  |          |
|------------------|----------------------------------|----------|
|                  | Radiation oncology               | 24 (2)   |
| Surgery          |                                  |          |
|                  | <i>Bariatric surgery</i>         | 3 (<1)   |
|                  | <i>General surgery</i>           | 93 (7)   |
|                  | <i>Oral surgery</i>              | 1 (<1)   |
|                  | <i>Pediatric surgery</i>         | 8 (1)    |
|                  | <i>Transplant surgery</i>        | 3 (<1)   |
|                  | <i>Trauma surgery</i>            | 3 (<1)   |
| Thoracic surgery |                                  | 31 (2)   |
| Urology          |                                  | 32 (3)   |
| NA               |                                  | 248 (20) |
| Multiple         |                                  | 18 (1)   |
| Other            |                                  |          |
|                  | <i>Other</i>                     | 3 (<1)   |
|                  | <i>Chronic health conditions</i> | 4 (<1)   |
|                  | <i>Clinical chemistry</i>        | 2 (<1)   |
|                  | <i>Dentistry</i>                 | 11 (1)   |
|                  | <i>Home care</i>                 | 2 (<1)   |
|                  | <i>Interventional radiology</i>  | 7 (1)    |
|                  | <i>Laboratory medicine</i>       | 7 (1)    |
|                  | <i>Palliative care</i>           | 2 (<1)   |
|                  | <i>Pharmacy</i>                  | 11 (1)   |
|                  | <i>Primary care</i>              | 2 (<1)   |
|                  | <i>Veterinary care</i>           | 1 (<1)   |

## Supplementary File 4

| Reference to Porter #,\$                                                                                                                                                                                                                        |          |
|-------------------------------------------------------------------------------------------------------------------------------------------------------------------------------------------------------------------------------------------------|----------|
| Porter, M. E. (2010). What is value in health care. <i>N Engl J Med</i> , 363(26), 2477-2481.                                                                                                                                                   | 953 (77) |
| Porter, M. E., & Teisberg, E. O. (2006). <i>Redefining health care: creating value-based competition on results</i> . Harvard business press.                                                                                                   | 208 (17) |
| Porter, M. E. (2009). A strategy for health care reform—toward a value-based system. <i>N Engl J Med</i> , 361(2), 109-112.                                                                                                                     | 150 (12) |
| Kaplan, R. S., & Porter, M. E. (2011). How to solve the cost crisis in health care. <i>Harv Bus Rev</i> , 89(9), 46-52.                                                                                                                         | 127 (10) |
| Porter, M. E., & Lee, T. H. (2013). The strategy that will fix health care. <i>Harvard business review</i> , 91(12), 24-24.                                                                                                                     | 113 (9)  |
| Porter, M. E., Larsson, S., & Lee, T. H. (2016). Standardizing patient outcomes measurement. <i>N Engl J Med</i> , 374(6), 504-506.                                                                                                             | 70 (6)   |
| Porter, M. E. (2008). Value-based health care delivery. <i>Annals of surgery</i> , 248(4), 503-509.                                                                                                                                             | 51 (4)   |
| Porter, M. E., & Teisberg, E. O. (2007). How physicians can change the future of health care. <i>Jama</i> , 297(10), 1103-1111.                                                                                                                 | 40 (3)   |
| Porter, M. E., & Teisberg, E. O. (2004). Redefining competition in health care. <i>Harvard business review</i> , 64-77.                                                                                                                         | 33 (3)   |
| Porter, M. E., Pabo, E. A., & Lee, T. H. (2013). Redesigning primary care: a strategic vision to improve value by organizing around patients' needs. <i>Health Affairs</i> , 32(3), 516-525.                                                    | 30 (2)   |
| Porter, M. E., & Lee, T. H. (2016). From volume to value in health care: the work begins. <i>Jama</i> , 316(10), 1047-1048.                                                                                                                     | 21 (2)   |
| Porter, M. E., & Kaplan, R. S. (2016). How to pay for health care. <i>Harv Bus Rev</i> , 94(7-8), 88-98.                                                                                                                                        | 13 (1)   |
| Porter, M. E., & Lee, T. H. (2015). Why strategy matters now. <i>N Engl J Med</i> , 372(18), 1681-1684.                                                                                                                                         | 12 (1)   |
| Porter, M. E. (1985). <i>Competitive Advantage: Creating and Sustaining Superior Performance</i> . New York: The Free Press. 557 p.                                                                                                             | 8 (1)    |
| Porter, M. E. (2008, August). Defining and introducing value in health care. In <i>Evidence-based medicine and the changing nature of health care: 2007 IOM annual meeting summary</i> (pp. 161-72). National Academies Press, Washington (DC). | 8 (1)    |
| Other articles*                                                                                                                                                                                                                                 | 101 (8)  |
| No ref                                                                                                                                                                                                                                          | 76 (6)   |
| Part of article with reference to Porter #,\$                                                                                                                                                                                                   |          |
| Introduction                                                                                                                                                                                                                                    | 564 (77) |
| Method                                                                                                                                                                                                                                          | 62 (8)   |
| Results                                                                                                                                                                                                                                         | 35 (5)   |
| Discussion                                                                                                                                                                                                                                      | 233 (32) |
| Conclusion                                                                                                                                                                                                                                      | 26 (4)   |
| Other                                                                                                                                                                                                                                           | 14 (2)   |



1  
2  
3 #Total is more than 100% because multiple answers could be selected. <sup>§</sup>58% (n=721) of the articles  
4 had one Porter reference, 36% of the articles had two or more references (mean: 2.6, range: 2-6).

5 \*This category contains 53 articles cited less than 8 times. <sup>§</sup>N=736, this question includes the articles  
6 with multiple section.  
7  
8  
9  
10  
11  
12  
13  
14  
15  
16  
17  
18  
19  
20  
21  
22  
23  
24  
25  
26  
27  
28  
29  
30  
31  
32  
33  
34  
35  
36  
37  
38  
39  
40  
41  
42  
43  
44  
45  
46  
47  
48  
49  
50  
51  
52  
53  
54  
55  
56  
57  
58  
59  
60

For peer review only

## Preferred Reporting Items for Systematic reviews and Meta-Analyses extension for Scoping Reviews (PRISMA-ScR) Checklist

| SECTION                           | ITEM | PRISMA-ScR CHECKLIST ITEM                                                                                                                                                                                                                                                                                  | REPORTED ON PAGE #               |
|-----------------------------------|------|------------------------------------------------------------------------------------------------------------------------------------------------------------------------------------------------------------------------------------------------------------------------------------------------------------|----------------------------------|
| <b>TITLE</b>                      |      |                                                                                                                                                                                                                                                                                                            |                                  |
| Title                             | 1    | Identify the report as a scoping review.                                                                                                                                                                                                                                                                   | 1                                |
| <b>ABSTRACT</b>                   |      |                                                                                                                                                                                                                                                                                                            |                                  |
| Structured summary                | 2    | Provide a structured summary that includes (as applicable): background, objectives, eligibility criteria, sources of evidence, charting methods, results, and conclusions that relate to the review questions and objectives.                                                                              | 2                                |
| <b>INTRODUCTION</b>               |      |                                                                                                                                                                                                                                                                                                            |                                  |
| Rationale                         | 3    | Describe the rationale for the review in the context of what is already known. Explain why the review questions/objectives lend themselves to a scoping review approach.                                                                                                                                   | 4 - 5                            |
| Objectives                        | 4    | Provide an explicit statement of the questions and objectives being addressed with reference to their key elements (e.g., population or participants, concepts, and context) or other relevant key elements used to conceptualize the review questions and/or objectives.                                  | 5 - 6                            |
| <b>METHODS</b>                    |      |                                                                                                                                                                                                                                                                                                            |                                  |
| Protocol and registration         | 5    | Indicate whether a review protocol exists; state if and where it can be accessed (e.g., a Web address); and if available, provide registration information, including the registration number.                                                                                                             | NA                               |
| Eligibility criteria              | 6    | Specify characteristics of the sources of evidence used as eligibility criteria (e.g., years considered, language, and publication status), and provide a rationale.                                                                                                                                       | 6                                |
| Information sources*              | 7    | Describe all information sources in the search (e.g., databases with dates of coverage and contact with authors to identify additional sources), as well as the date the most recent search was executed.                                                                                                  | 6                                |
| Search                            | 8    | Present the full electronic search strategy for at least 1 database, including any limits used, such that it could be repeated.                                                                                                                                                                            | Supplementary file I             |
| Selection of sources of evidence† | 9    | State the process for selecting sources of evidence (i.e., screening and eligibility) included in the scoping review.                                                                                                                                                                                      | 6 - 7                            |
| Data charting process‡            | 10   | Describe the methods of charting data from the included sources of evidence (e.g., calibrated forms or forms that have been tested by the team before their use, and whether data charting was done independently or in duplicate) and any processes for obtaining and confirming data from investigators. | 7                                |
| Data items                        | 11   | List and define all variables for which data were sought and any assumptions and simplifications made.                                                                                                                                                                                                     | Page 7 and Supplementary file II |
| Critical appraisal of individual  | 12   | If done, provide a rationale for conducting a critical appraisal of included sources of evidence; describe                                                                                                                                                                                                 | NA                               |

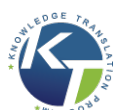

| SECTION                                       | ITEM | PRISMA-ScR CHECKLIST ITEM                                                                                                                                                                       | REPORTED ON PAGE #       |
|-----------------------------------------------|------|-------------------------------------------------------------------------------------------------------------------------------------------------------------------------------------------------|--------------------------|
| sources of evidence§                          |      | the methods used and how this information was used in any data synthesis (if appropriate).                                                                                                      |                          |
| Synthesis of results                          | 13   | Describe the methods of handling and summarizing the data that were charted.                                                                                                                    | 7                        |
| <b>RESULTS</b>                                |      |                                                                                                                                                                                                 |                          |
| Selection of sources of evidence              | 14   | Give numbers of sources of evidence screened, assessed for eligibility, and included in the review, with reasons for exclusions at each stage, ideally using a flow diagram.                    | Figure 1                 |
| Characteristics of sources of evidence        | 15   | For each source of evidence, present characteristics for which data were charted and provide the citations.                                                                                     | Pages 8 - 10 and Table 1 |
| Critical appraisal within sources of evidence | 16   | If done, present data on critical appraisal of included sources of evidence (see item 12).                                                                                                      | NA                       |
| Results of individual sources of evidence     | 17   | For each included source of evidence, present the relevant data that were charted that relate to the review questions and objectives.                                                           | Supplementary file II    |
| Synthesis of results                          | 18   | Summarize and/or present the charting results as they relate to the review questions and objectives.                                                                                            | 8 - 16                   |
| <b>DISCUSSION</b>                             |      |                                                                                                                                                                                                 |                          |
| Summary of evidence                           | 19   | Summarize the main results (including an overview of concepts, themes, and types of evidence available), link to the review questions and objectives, and consider the relevance to key groups. | 17                       |
| Limitations                                   | 20   | Discuss the limitations of the scoping review process.                                                                                                                                          | 19                       |
| Conclusions                                   | 21   | Provide a general interpretation of the results with respect to the review questions and objectives, as well as potential implications and/or next steps.                                       | 20                       |
| <b>FUNDING</b>                                |      |                                                                                                                                                                                                 |                          |
| Funding                                       | 22   | Describe sources of funding for the included sources of evidence, as well as sources of funding for the scoping review. Describe the role of the funders of the scoping review.                 | 20                       |

JBI = Joanna Briggs Institute; PRISMA-ScR = Preferred Reporting Items for Systematic reviews and Meta-Analyses extension for Scoping Reviews.

\* Where *sources of evidence* (see second footnote) are compiled from, such as bibliographic databases, social media platforms, and Web sites.

† A more inclusive/heterogeneous term used to account for the different types of evidence or data sources (e.g., quantitative and/or qualitative research, expert opinion, and policy documents) that may be eligible in a scoping review as opposed to only studies. This is not to be confused with *information sources* (see first footnote).

‡ The frameworks by Arksey and O'Malley (6) and Levac and colleagues (7) and the JBI guidance (4, 5) refer to the process of data extraction in a scoping review as data charting.

§ The process of systematically examining research evidence to assess its validity, results, and relevance before using it to inform a decision. This term is used for items 12 and 19 instead of "risk of bias" (which is more applicable to systematic reviews of interventions) to include and acknowledge the various sources of evidence that may be used in a scoping review (e.g., quantitative and/or qualitative research, expert opinion, and policy document).

From: Tricco AC, Lillie E, Zarin W, O'Brien KK, Colquhoun H, Levac D, et al. PRISMA Extension for Scoping Reviews (PRISMA-ScR): Checklist and Explanation. *Ann Intern Med.* 2018;169:467–473. doi: 10.7326/M18-0850.



St. Michael's

Inspired Care.  
Inspiring Science.

For peer review only - <http://bmjopen.bmj.com/site/about/guidelines.xhtml>
