# Supplementary material for: Mapping the extent, range and nature of research activity on value-based healthcare in the 15 years following its introduction (2006–2021): a scoping review
Source: PubMed Central journal article supplement — BMJ Open. 2022 Aug 16;12(8):e064983. doi: 10.1136/bmjopen-2022-064983 (PMC9386216; doi:10.1136/bmjopen-2022-064983), 2022-08-16
Supplement: bmjopen-2022-064983supp001.pdf [file bmjopen-2022-064983supp001.pdf]

**Supplementary File 1**

The electronic search strategy used for PubMed.

*("VBHC"[tiab] OR "value-added care"[tiab] OR "value added care"[tiab] OR "value-added healthcare"[tiab] OR "value added healthcare"[tiab]*

*OR*

*(("Delivery of Health Care"[Mesh] OR "Health Care"[tiab] OR "healthcare"[tiab] OR "care"[tiab] OR "Costs and Cost Analysis"[Mesh] OR "cost"[tiab] OR "costs"[tiab] OR "pricing"[tiab] OR "payment"[tiab] OR "payments"[tiab] OR "purchasing"[tiab] OR "expenditure"[tiab] OR "expenditures"[tiab] OR "economic"[tiab] OR "economics"[tiab] OR "insurance"[tiab] OR "Quality of Health Care"[Mesh] OR "outcome"[tiab] OR "outcomes"[tiab] OR "PROMS"[ti] OR "indicator"[tiab] OR "indicators"[tiab] OR "benchmark"[tiab] OR "benchmarking"[tiab] OR "best practice"[tiab] OR "best practices"[tiab] OR "Integrated Practice units"[tiab] OR "IPU"[ti] OR "lean"[tiab] OR "six sigma"[tiab] OR "six sigmas"[tiab] OR "management"[tiab] OR "organisation"[tiab] OR "organization"[tiab] OR "Contracts"[Mesh] OR "contracting"[tiab] OR "contract"[tiab] OR "contracts"[tiab])*

*AND*

*("value-based"[tiab] OR "value based"[tiab]))*

*AND*

*(("2006/01/01"[PDat]: "2030/12/31"[PDat]))*
