# Supplementary material for: Mapping the extent, range and nature of research activity on value-based healthcare in the 15 years following its introduction (2006–2021): a scoping review
Source: PubMed Central journal article supplement — BMJ Open. 2022 Aug 16;12(8):e064983. doi: 10.1136/bmjopen-2022-064983 (PMC9386216; doi:10.1136/bmjopen-2022-064983), 2022-08-16
Supplement: bmjopen-2022-064983supp003.pdf [file bmjopen-2022-064983supp003.pdf]

## Supplementary File 3

| Medical specialty                           |                                         | N (%)    |
|---------------------------------------------|-----------------------------------------|----------|
| Allergy and immunology                      |                                         | 2 (<1)   |
| Anesthesiology                              |                                         | 38 (3)   |
| Colon and rectal surgery                    |                                         | 20 (2)   |
| Dermatology                                 |                                         | 9 (1)    |
| Emergency medicine                          |                                         | 10 (1)   |
| Family medicine                             |                                         | 4 (<1)   |
| Internal medicine                           |                                         |          |
|                                             | <i>Cardiology</i>                       | 35 (3)   |
|                                             | <i>Endocrinology</i>                    | 3 (<1)   |
|                                             | <i>Gastroenterology</i>                 | 33 (3)   |
|                                             | <i>Geriatric medicine</i>               | 9 (1)    |
|                                             | <i>Hematology</i>                       | 8 (1)    |
|                                             | <i>Infectious disease</i>               | 8 (1)    |
|                                             | <i>Internal medicine general</i>        | 14 (1)   |
|                                             | <i>Nephrology</i>                       | 8 (1)    |
|                                             | <i>Oncology</i>                         | 34 (3)   |
|                                             | <i>Pulmonary disease</i>                | 14 (1)   |
|                                             | <i>Rheumatology</i>                     | 10 (1)   |
|                                             | <i>Sleep medicine</i>                   | 2 (<1)   |
| Neurological surgery                        |                                         | 22 (2)   |
| Neurological surgery and orthopedic surgery |                                         | 18 (1)   |
| Neurology                                   |                                         | 20 (2)   |
| Obstetrics and gynecology                   |                                         | 26 (2)   |
| Ophthalmology                               |                                         | 12 (1)   |
| Orthopedic surgery                          |                                         | 182 (15) |
| Otolaryngology                              |                                         | 29 (2)   |
| Pathology                                   |                                         | 2 (<1)   |
| Pediatrics                                  |                                         |          |
|                                             | <i>Neonatal-perinatal medicine</i>      | 5 (<1)   |
|                                             | <i>Pediatric cardiology</i>             | 12 (1)   |
|                                             | <i>Pediatric critical care medicine</i> | 1 (<1)   |
|                                             | <i>Pediatric endocrinology</i>          | 1 (<1)   |
|                                             | <i>Pediatric gastroenterology</i>       | 1 (<1)   |
|                                             | <i>Pediatrics general</i>               | 22 (2)   |
|                                             | <i>Pediatric hematology-oncology</i>    | 1 (<1)   |
|                                             | <i>Pediatric infectious diseases</i>    | 5 (<1)   |
|                                             | <i>Pediatric pulmonology</i>            | 2 (<1)   |
| Physical medicine and rehabilitation        |                                         | 20 (2)   |
| Plastic surgery                             |                                         | 31 (2)   |
| Psychiatry                                  |                                         | 16 (1)   |
| Radiology                                   |                                         |          |
|                                             | Diagnostic radiology                    | 37 (3)   |

|                  |                                  |          |
|------------------|----------------------------------|----------|
|                  | Radiation oncology               | 24 (2)   |
| Surgery          |                                  |          |
|                  | <i>Bariatric surgery</i>         | 3 (<1)   |
|                  | <i>General surgery</i>           | 93 (7)   |
|                  | <i>Oral surgery</i>              | 1 (<1)   |
|                  | <i>Pediatric surgery</i>         | 8 (1)    |
|                  | <i>Transplant surgery</i>        | 3 (<1)   |
|                  | <i>Trauma surgery</i>            | 3 (<1)   |
| Thoracic surgery |                                  | 31 (2)   |
| Urology          |                                  | 32 (3)   |
| NA               |                                  | 248 (20) |
| Multiple         |                                  | 18 (1)   |
| Other            |                                  |          |
|                  | <i>Other</i>                     | 3 (<1)   |
|                  | <i>Chronic health conditions</i> | 4 (<1)   |
|                  | <i>Clinical chemistry</i>        | 2 (<1)   |
|                  | <i>Dentistry</i>                 | 11 (1)   |
|                  | <i>Home care</i>                 | 2 (<1)   |
|                  | <i>Interventional radiology</i>  | 7 (1)    |
|                  | <i>Laboratory medicine</i>       | 7 (1)    |
|                  | <i>Palliative care</i>           | 2 (<1)   |
|                  | <i>Pharmacy</i>                  | 11 (1)   |
|                  | <i>Primary care</i>              | 2 (<1)   |
|                  | <i>Veterinary care</i>           | 1 (<1)   |
