# Supplementary material for: Mapping the extent, range and nature of research activity on value-based healthcare in the 15 years following its introduction (2006–2021): a scoping review
Source: PubMed Central journal article supplement — BMJ Open. 2022 Aug 16;12(8):e064983. doi: 10.1136/bmjopen-2022-064983 (PMC9386216; doi:10.1136/bmjopen-2022-064983), 2022-08-16
Supplement: bmjopen-2022-064983supp004.pdf [file bmjopen-2022-064983supp004.pdf]

## Supplementary File 4

| Reference to Porter #,\$                                                                                                                                                                                                                        |          |
|-------------------------------------------------------------------------------------------------------------------------------------------------------------------------------------------------------------------------------------------------|----------|
| Porter, M. E. (2010). What is value in health care. <i>N Engl J Med</i> , 363(26), 2477-2481.                                                                                                                                                   | 953 (77) |
| Porter, M. E., & Teisberg, E. O. (2006). <i>Redefining health care: creating value-based competition on results</i> . Harvard business press.                                                                                                   | 208 (17) |
| Porter, M. E. (2009). A strategy for health care reform—toward a value-based system. <i>N Engl J Med</i> , 361(2), 109-112.                                                                                                                     | 150 (12) |
| Kaplan, R. S., & Porter, M. E. (2011). How to solve the cost crisis in health care. <i>Harv Bus Rev</i> , 89(9), 46-52.                                                                                                                         | 127 (10) |
| Porter, M. E., & Lee, T. H. (2013). The strategy that will fix health care. <i>Harvard business review</i> , 91(12), 24-24.                                                                                                                     | 113 (9)  |
| Porter, M. E., Larsson, S., & Lee, T. H. (2016). Standardizing patient outcomes measurement. <i>N Engl J Med</i> , 374(6), 504-506.                                                                                                             | 70 (6)   |
| Porter, M. E. (2008). Value-based health care delivery. <i>Annals of surgery</i> , 248(4), 503-509.                                                                                                                                             | 51 (4)   |
| Porter, M. E., & Teisberg, E. O. (2007). How physicians can change the future of health care. <i>Jama</i> , 297(10), 1103-1111.                                                                                                                 | 40 (3)   |
| Porter, M. E., & Teisberg, E. O. (2004). Redefining competition in health care. <i>Harvard business review</i> , 64-77.                                                                                                                         | 33 (3)   |
| Porter, M. E., Pabo, E. A., & Lee, T. H. (2013). Redesigning primary care: a strategic vision to improve value by organizing around patients' needs. <i>Health Affairs</i> , 32(3), 516-525.                                                    | 30 (2)   |
| Porter, M. E., & Lee, T. H. (2016). From volume to value in health care: the work begins. <i>Jama</i> , 316(10), 1047-1048.                                                                                                                     | 21 (2)   |
| Porter, M. E., & Kaplan, R. S. (2016). How to pay for health care. <i>Harv Bus Rev</i> , 94(7-8), 88-98.                                                                                                                                        | 13 (1)   |
| Porter, M. E., & Lee, T. H. (2015). Why strategy matters now. <i>N Engl J Med</i> , 372(18), 1681-1684.                                                                                                                                         | 12 (1)   |
| Porter, M. E. (1985). <i>Competitive Advantage: Creating and Sustaining Superior Performance</i> . New York: The Free Press. 557 p.                                                                                                             | 8 (1)    |
| Porter, M. E. (2008, August). Defining and introducing value in health care. In <i>Evidence-based medicine and the changing nature of health care: 2007 IOM annual meeting summary</i> (pp. 161-72). National Academies Press, Washington (DC). | 8 (1)    |
| Other articles*                                                                                                                                                                                                                                 | 101 (8)  |
| No ref                                                                                                                                                                                                                                          | 76 (6)   |
| Part of article with reference to Porter #,\$                                                                                                                                                                                                   |          |
| Introduction                                                                                                                                                                                                                                    | 564 (77) |
| Method                                                                                                                                                                                                                                          | 62 (8)   |
| Results                                                                                                                                                                                                                                         | 35 (5)   |
| Discussion                                                                                                                                                                                                                                      | 233 (32) |
| Conclusion                                                                                                                                                                                                                                      | 26 (4)   |
| Other                                                                                                                                                                                                                                           | 14 (2)   |

#Total is more than 100% because multiple answers could be selected. <sup>§</sup>58% (n=721) of the articles had one Porter reference, 36% of the articles had two or more references (mean: 2.6, range: 2-6).

\*This category contains 53 articles cited less than 8 times. <sup>§</sup>N=736, this question includes the articles with multiple section.
